# Diffuse optical reconstructions of fNIRS data using Maximum Entropy on the Mean

Zhengchen Cai<sup>a,\*</sup>, Alexis Machado<sup>b</sup>, Rasheda Arman Chowdhury<sup>c</sup>, Amanda Spilkin<sup>a</sup>, Thomas Vincent<sup>d</sup>, Ümit Aydin<sup>a,e</sup>, Giovanni Pellegrino<sup>b,f</sup>, Jean-Marc Lina<sup>g,h</sup>, Christophe Grova<sup>a,b,h,i</sup>

<sup>a</sup>*Department of Physics and PERFORM Centre, Concordia University, Montréal, Québec, Canada*

<sup>b</sup>*Neurology and Neurosurgery Department, Montreal Neurological Institute (MNI), McGill University, Montréal, Québec, Canada*

<sup>c</sup>*CHU Sainte-Justine Research Centre, Montréal, Québec, Canada*

<sup>d</sup>*Centre de médecine préventive et d'activité physique, Montreal Heart Institute, Montreal Heart Institute, Montréal, Canada, Montréal, Québec, Canada*

<sup>e</sup>*MRC Social, Genetic and Developmental Psychiatry Centre, Institute of Psychiatry, Psychology and Neuroscience, King's College London, PO80, London, UK*

<sup>f</sup>*San Camillo Hospital IRCCS, Venice, Italy*

<sup>g</sup>*École de technologie supérieure de l'Université du Québec, Canada*

<sup>h</sup>*Centre de Recherches Mathématiques, Université de Montréal, Québec, Canada*

<sup>i</sup>*Multimodal Functional Imaging Lab, Biomedical Engineering Department, McGill University, Montréal, Québec, Canada*

---

## Abstract

Functional near-infrared spectroscopy (fNIRS) measures the hemoglobin concentration changes associated with neuronal activity. Diffuse optical tomography (DOT) consists of reconstructing the optical density changes measured from scalp channels to the oxy-/deoxy-hemoglobin (i.e., HbO/HbR) concentration changes within the cortical regions. In the present study, we adapted a nonlinear source localization method developed and validated in the con-

---

\*Corresponding author at: Concordia University, Department of Physics, Loyola Science Complex, 7141 Sherbrooke Street West Montréal, Québec, Canada, H4B 1R6. Tel: +1 514 848 2424 ext.3393.

*Email address:* zhengchen.cai@mail.concordia.ca (Zhengchen Cai)

text of Electro- and Magneto-Encephalography (EEG/MEG): the Maximum Entropy on the Mean (MEM), to solve the inverse problem of DOT reconstruction. We first introduced depth weighting strategy within the MEM framework for DOT reconstruction to avoid biasing the reconstruction results of DOT towards superficial regions. We also proposed a new initialization of the MEM model improving the temporal accuracy of the original MEM framework. To evaluate MEM performance and compare with widely used depth weighted Minimum Norm Estimate (MNE) inverse solution, we applied a realistic simulation scheme which contained 4000 simulations generated by 250 different seeds at different locations and 4 spatial extents ranging from 3 to  $40\text{cm}^2$  along the cortical surface. Our results showed that overall MEM provided more accurate DOT reconstructions than MNE. Moreover, we found that MEM was remained particularly robust in low signal-to-noise ratio (SNR) conditions. The proposed method was further illustrated by comparing to functional Magnetic Resonance Imaging (fMRI) activation maps, on real data involving finger tapping tasks with two different montages. The results showed that MEM provided more accurate HbO and HbR reconstructions in spatial agreement with the main fMRI cluster, when compared to MNE.

*Keywords:* fNIRS, Diffuse Optical Tomography (DOT), Maximum Entropy on the Mean (MEM), Minimum Norm Estimation (MNE), Depth weighting, Personalized Optimal Montage

---

## Highlights

- We introduced a new fNIRS reconstruction method - Maximum Entropy on the Mean.
- We implemented depth weighting strategy within the MEM framework.
- We improved the temporal accuracy of the original MEM reconstruction.
- Performances of MEM and MNE were evaluated with realistic simulations and real data.
- MEM provided more accurate and robust reconstructions than MNE.

## 1 Introduction

Functional Near-infrared spectroscopy (fNIRS) is a non-invasive functional neuroimaging modality. It detects changes in oxy-/deoxy-hemoglobin (i.e., HbO/HbR) concentration within head tissues through the measurement of near-infrared light absorption using sources and detectors placed on the surface of the head (Scholkmann et al., 2014; Yücel et al., 2021). In continuous wave fNIRS, the conventional way to transform variations in optical density to HbO/HbR concentration changes at the level of each source-detector channel, is to apply the modified Beer Lambert Law (mBLL) (Delpy et al., 1988). This model assumes homogeneous concentration changes within the detecting region, i.e., ignoring the partial volume effects which indicates the absorption of light within the illuminated regions varies locally. This assumption reduces quantitative accuracy of HbO/HbR concentration changes

14 when dealing with focal hemodynamic changes (Boas et al., 2001; Strangman  
15 et al., 2003).

16 In order to handle these important quantification biases associated with  
17 sensor level based analysis, diffuse optical tomography (DOT) has been pro-  
18 posed to reconstruct, from sensor level measures of the optical density, the  
19 fluctuations of HbO/HbR concentrations within the brain (Arridge, 1999).  
20 This technique not only provides better spatial localization accuracy and  
21 resolution of the underlying hemodynamic responses (Boas et al., 2004a;  
22 Joseph et al., 2006), but also avoids partial volume effect in classical mBLL,  
23 hence achieves better quantitative estimation of HbO/HbR concentration  
24 changes (Boas et al., 2001; Strangman et al., 2003). DOT has been applied  
25 to reconstruct hemodynamic responses in sensory and motor cortex during  
26 median-nerve stimulation (Dehghani et al., 2009; Hughes et al., 2004) and  
27 finger tapping (Boas et al., 2004a; Yamashita et al., 2016); to conduct visual  
28 cortex retinotopic mapping (Zeff et al., 2007; White and Culver, 2010; Egge-  
29 brecht et al., 2012) and to simultaneous image hemodynamic responses over  
30 the motor and visual cortex (White et al., 2009).

31 To formalize DOT reconstruction, one needs to solve two main problems.  
32 The first one is the forward problem which estimates a forward model or sen-  
33 sitivity matrix that maps local absorption changes within the brain to varia-  
34 tions of optical density changes measured by each channel (Boas et al., 2002).  
35 The second problem is the inverse problem which aims at reconstructing the  
36 fluctuations of hemodynamic activity within the brain from scalp measure-  
37 ments (Arridge, 2011). The forward problem can be solved by generating a  
38 subject specific anatomical model, describing accurately propagation of light



39 within the head. Such anatomical model is obtained by segmenting anatomical  
40 Magnetic Resonance Imaging (MRI) data, typically into five tissues (i.e.,  
41 scalp, skull, cerebro-spinal fluid (CSF), white matter and gray matter), before  
42 initializing absorption and scattering coefficients values for each tissue  
43 type and for each wavelength (Fang, 2010; Machado et al., 2018). Solving the  
44 inverse problem relies on solving an ill-posed problem which does not provide  
45 a unique solution, unless specific additional constraints are added. The most  
46 widely used inverse method in DOT is a linear approach based on Minimum  
47 Norm Estimate (MNE) originally proposed for solving the inverse problem of  
48 Magnetoencephalography (MEG) and Electroencephalography (EEG) source  
49 localization (Hämäläinen and Ilmoniemi, 1994). It minimizes the  $L_2$  norm  
50 of the reconstruction error along with Tikhonov regularization (Boas et al.,  
51 2004b; Zeff et al., 2007; Dehghani et al., 2009; Eggebrecht et al., 2012, 2014;  
52 Tremblay et al., 2018). Other strategies to solve DOT inverse problem have  
53 also been considered, such as sparse regularization using the  $L_1$  norm (Süzen  
54 et al., 2010; Okawa et al., 2011; Kavuri et al., 2012; Prakash et al., 2014;  
55 Tremblay et al., 2018) and Expectation Maximization (EM) algorithm (Cao  
56 et al., 2007). A non-linear method based on hierarchical Bayesian model for  
57 which inference is obtained through an iterative process (Shimokawa et al.,  
58 2012, 2013) has been proposed and applied on finger tapping experiments in  
59 (Yamashita et al., 2016).

60 Maximum Entropy on the Mean (MEM) framework was first proposed by  
61 Amblard et al., 2004 and then applied and carefully evaluated by our group  
62 in the context of EEG/MEG source imaging (Grova et al., 2006; Chowdhury  
63 et al., 2013). The MEM framework was specifically designed and evaluated

64 for its ability to recover spatially extended generators (Heers et al., 2016;  
65 Pellegrino et al., 2016; Chowdhury et al., 2016; Grova et al., 2016). We  
66 recently demonstrated its excellent performances when dealing with focal  
67 sources (Hedrich et al., 2017) and when applied on clinical epilepsy data  
68 (Chowdhury et al., 2018; Pellegrino et al., 2020). In addition to its unique  
69 ability to recover the spatial extent of the underlying generators, we also  
70 demonstrated MEM's excellent accuracy in low SNR conditions, with the  
71 ability to limit the influence of distant spurious sources (Chowdhury et al.,  
72 2016; Hedrich et al., 2017; Heers et al., 2016; Pellegrino et al., 2020; von  
73 Ellenrieder et al., 2016; Aydin et al., 2020).

74 We believe that these important aspects should be carefully considered  
75 in the context of fNIRS reconstruction. The first one is the ability to ac-  
76 curately recover the spatial extent of the underlying hemodynamic activity  
77 for both focal and extended generators. The second one is to provide robust  
78 reconstruction results when data SNR decreases, especially when considering  
79 the fact that it is challenging to maintain a good intra-subject consistence  
80 using continuous-wave fNIRS due to its relatively low SNR (Chen et al.,  
81 2020). Therefore, our main objective was to adapt the MEM framework  
82 for fNIRS reconstruction and carefully evaluate its performance. Moreover,  
83 fNIRS reconstruction results tends to be biased towards more superficial re-  
84 gions, because the light sensitivity profile decreases exponentially with the  
85 depth of the generators (Strangman et al., 2013). To overcome this bias, we  
86 implemented and evaluated a depth weighted variant of the MEM framework.

87 The article is organized as follows. The methodology of depth weighted  
88 MEM for DOT is first presented. Then, we described our validation frame-

89 work using realistic simulations and associated validation metrics. fNIRS  
90 reconstruction using MEM was compared with widely used depth weighted  
91 Minimum Norm Estimate (MNE) inverse solution. Finally, illustrations of  
92 the methods on finger tapping fNIRS data set acquired with two different  
93 montages from 6 healthy subjects are provided and compared with functional  
94 Magnetic Resonance Imaging (fMRI) results.

## 95 **2. Material and Methods**

### 96 *2.1. fNIRS reconstruction*

97 To perform fNIRS reconstructions, the relationship between measured op-  
98 tical density changes on the scalp and wavelength specific absorption changes  
99 within head tissue is usually expressed using the following linear model (Ar-  
100 ridge, 1999):

$$101 \quad Y = AX + e \quad (1)$$

102 where  $Y$  is a matrix ( $p \times t$ ) which represents the wavelength specific measure-  
103 ment of optical density changes in  $p$  channels at  $t$  time samples.  $X$  ( $q \times t$ )  
104 represents the unknown wavelength specific absorption changes in  $q$  locations  
105 along the cortex at time  $t$ .  $A$  ( $p \times q$ ) is called the light sensitivity matrix  
106 which is actually the forward model relating absorption changes in the head  
107 to optical density changes measured in each channel. Finally,  $e$  ( $p \times t$ ) models  
108 the additive measurement noise. Solving the fNIRS tomographic reconstruc-  
109 tion problem consists in solving an inverse problem which can be seen as the  
110 estimation of matrix  $X$  (i.e. the amplitude for each location  $q$  at time  $t$ ).  
111 However, this problem is ill-posed and admits an infinite number of possible

112 solutions. Therefore, solving the DOT inverse problem requires adding ad-  
113 ditional prior information or regularization constraints to identify a unique  
114 solution.

115 In DOT studies, anatomical constraints can be considered by defining the  
116 reconstruction solution space (i.e. where  $q$  is located ) within the gray matter  
117 volume (Boas and Dale, 2005) or along the cortical surface (Huppert et al.,  
118 2017; Machado et al., 2021). In EEG and MEG source localization studies  
119 (Dale and Sereno, 1993; Grova et al., 2006; Chowdhury et al., 2013), it also  
120 is common to constrain the reconstruction along the cortical surface. In this  
121 study, the reconstruction space was considered as the mid surface defined as  
122 the middle layer between gray matter/pial and gray/white matter interfaces  
123 (Fischl et al., 2002).

## 124 2.2. Minimum Norm Estimation (MNE)

125 Minimum norm estimation is one of the most widely used reconstruction  
126 methods in DOT (Zeff et al., 2007; Dehghani et al., 2009; White et al., 2009;  
127 White and Culver, 2010; Eggebrecht et al., 2012, 2014; Yamashita et al.,  
128 2016). Such estimation can be expressed using a Bayesian formulation which  
129 solves the inverse problem by estimating the posterior distribution  $P(X|Y) =$   
130  $\frac{P(Y|X)P(X)}{P(Y)}$  (i.e. the probability distribution of parameter  $X$  conditioned on  
131 data  $Y$ ). A solution can be computed by imposing Gaussian distribution  
132 priors on the generators  $X$  ( $P(X) = N(0, \Sigma_s^{-1})$ ) and the noise  $e$  ( $P(e) =$   
133  $N(0, \Sigma_d^{-1})$ ).  $\Sigma_d$  is the inverse of the noise covariance which could be estimated  
134 from baseline recordings.  $\Sigma_s$  is the inverse of the source covariance which is  
135 assumed to be an identity matrix in conventional MNE.

136 The Maximum a Posteriori (MAP) estimator of the posterior distribution

137  $P(X|Y)$  can be obtained using maximum likelihood estimation:

$$\begin{aligned} \hat{X}_{MNE} &= \underset{X}{\operatorname{argmin}} \left( \|Y - AX\|_{\Sigma_d}^2 + \lambda \|X\|_{\Sigma_s}^2 \right) \\ &= (A^T \Sigma_d A + \lambda \Sigma_s)^{-1} A^T \Sigma_d Y \end{aligned} \quad (2)$$

139 where  $\hat{X}_{MNE}$  is the reconstructed absorption changes along the cortical sur-  
140 face.  $\lambda$  is a hyperparameter to regularize the inversion using the priori mini-  
141 mum norm constraint  $\|X\|_{\Sigma_s}^2$ . In this study, we applied the standard L-Curve  
142 method to estimate this  $\lambda$  as suggested in (Hansen, 2000).

### 143 2.3. Depth weighted MNE

144 Standard MNE solutions assumes  $\Sigma_s = I$ , which then tends to bias the  
145 inverse solution towards the generators exhibiting large sensitivity in the for-  
146 ward model, therefore the most superficial ones (Fuchs et al., 1999). When  
147 compared to EEG-MEG source localization, such bias is even more pro-  
148 nounced in fNIRS since within the forward model light sensitivity values  
149 decrease exponentially with the depth (Strangman et al., 2013). This bias  
150 can be compensated by scaling the source covariance matrix such that the  
151 variances are equalized (van der Sluis, 1969; Fuchs et al., 1999). In the con-  
152 text of DOT, depth weighted MNE has been proposed by Culver et al., 2003  
153 as an approach to compensate this effect and applied in different studies (Zeff  
154 et al., 2007; Dehghani et al., 2009; White et al., 2009; Eggebrecht et al., 2012,  
155 2014). In practice, depth weighting can be formulated differently, here we  
156 consider a generalized expression for the implementation of depth weighted  
157 MNE as proposed in Lin et al., 2006. It consists in initializing the source  
158 covariance matrix as  $\Sigma_s^{-1/2} = \Lambda$ , resulting in a so called depth weighted MNE

159 solution, described as follows:

$$\begin{aligned}
 \hat{X}_{dMNE} &= \operatorname{argmin} (\|Y - AX\|_{\Sigma_d}^2 + \lambda \|X\|_{\Sigma_s}^2) \\
 &= (A^T \Sigma_d A + \lambda (\Lambda \Lambda^t)^{-1})^{-1} A^T \Sigma_d Y \\
 \operatorname{diag}(\Lambda) &= \frac{1}{\operatorname{diag}((A^T \Sigma_d A)^\omega)}
 \end{aligned}
 \tag{3}$$

161 Depth weighted MNE solution takes into account the forward model  $A$  for  
 162 each position in the brain and therefore penalizes most superficial regions  
 163 exhibiting larger amplitude in  $A$ , by enhancing the contribution to deeper  
 164 regions.  $\omega$  is a weighting parameter tuning the amount of depth compen-  
 165 sation to be applied. The larger is  $\omega$ , the more depth compensation is con-  
 166 sidered.  $\omega = 0$  would therefore refer to no depth compensation and an  
 167 identity source covariance model.  $\omega = 0.5$  refers to standard depth weight-  
 168 ing approach mentioned above. In the present study, we carefully evalu-  
 169 ated the impact of this parameter on DOT accuracy with a set of  $\omega$  values  
 170 (i.e.  $\omega = 0, 0.1, 0.3, 0.5, 0.7$  and  $0.9$ ).

## 171 2.4. Maximum Entropy on the Mean (MEM) for fNIRS 3D reconstruction

### 172 2.4.1. MEM framework

173 The main contribution of this study is the first adaptation and evalua-  
 174 tion of MEM method (Amblard et al., 2004; Grova et al., 2006; Chowdhury  
 175 et al., 2013) to perform DOT reconstructions in fNIRS. Within the MEM  
 176 framework, the intensity of  $x$ , i.e. amplitude of  $X$  at each location  $q$  in Eq.1,  
 177 is considered as a random variable, described by the following probability  
 178 distribution  $dp(x) = p(x)dx$ . The Kullback-Leibler divergence or  $\nu$ -entropy  
 179 of  $dp(x)$  relative to a prior distribution  $d\nu(x)$  is defined as,

$$S_\nu(dp(x)) = - \int_x \log \left( \frac{dp(x)}{d\nu(x)} \right) dp(x) = - \int_x f(x) \log(f(x)) d\nu(x) \tag{4}$$

181 where  $f(x)$  is the  $\nu$ -density of  $dp(x)$  defined as  $dp(x) = f(x)d\nu(x)$ . Following  
 182 a Bayesian approach to introduce the data fit, we denote  $C_m$  as the set of  
 183 probability distributions on  $x$  that explains the data on average:

$$184 \quad Y - [A|I_q] \begin{bmatrix} E_{dp}[x] \\ e \end{bmatrix} = 0, \quad dp \in C_m \quad (5)$$

185 where  $Y$  represents the measured optical density changes,  $E_{dp}[x] = \int x dp(x)$   
 186 represents the statistical expectation of  $x$  under the probability distribution  
 187  $dp$ , and  $I_q$  is an identity matrix of  $(q \times q)$  dimension. Therefore, within the  
 188 MEM framework, a unique solution of  $dp(x)$  could be obtained,

$$189 \quad dp^*(x) = \operatorname{argmax}_{dp(x) \in C_m} (S_v(dp(x))) \quad (6)$$

190 The solution of  $dp^*(x)$  can be solved by maximizing the  $\nu$ -entropy which  
 191 is a convex function. It is equivalent to minimize an unconstrained concave  
 192 Lagrangian function i.e.,  $L(dp(x), \kappa, \lambda)$ , along with two Lagrangian constraint  
 193 parameters, i.e.,  $\kappa$  and  $\lambda$ . It is finally equivalent to maximize a cost function  
 194  $D(\lambda)$  which is described as,

$$195 \quad D(\lambda) = \lambda^T Y - F_v(A^T \lambda) - \frac{1}{2} \lambda^T \Sigma_d^{-1} (\Sigma_d^{-1})^T \lambda \quad (7)$$

196 where  $\Sigma_d^{-1}$  is the noise covariance matrix.  $F_v$  represents the free energy  
 197 associated with reference  $d\nu(x)$ . It is important to mention that  $D(\lambda)$  is now  
 198 an optimization problem within a space of dimension equal to the number of  
 199 sensors. Therefore, if we estimate  $\lambda^* = \operatorname{argmax}_\lambda D(\lambda)$ , the unique solution  
 200 of MEM framework is then obtained from the gradient of the free energy.

$$201 \quad \hat{X}_{MEM} = \nabla_\xi F_v^*(\xi)|_{\xi=A^T \lambda^*} \quad (8)$$

202 For further details on MEM implementation and theory we refer the reader  
 203 to (Amblard et al., 2004; Grova et al., 2006; Chowdhury et al., 2013).

204 *2.4.2. Construction of the prior distribution for MEM estimation*

205 To define the prior distribution  $d\nu(x)$  mentioned above, we assumed that  
206 brain activity can be depicted by a set of  $K$  non-overlapping and independent  
207 cortical parcels. Then the reference distribution  $d\nu(x)$  can be modeled as,

$$208 \quad d\nu(x) = \prod_{k=1}^K [(1 - \alpha_k)\delta(x_k) + \alpha_k N(\mu_k, \Sigma_k)] dx_k, \quad 0 < \alpha_k < 1 \quad (9)$$

209 Each cortical parcel  $k$  is characterized by an activation state, defined by the  
210 hidden variable  $S_k$ , describing if the parcel is active or not. Therefore we  
211 denote  $\alpha_k$  as the probability of  $k^{th}$  parcel to be active, i.e.,  $Prob(S_k = 1)$ .  $\delta_k$   
212 is a Dirac function that allows to “switch off” the parcel when considered as  
213 inactive (i.e.,  $S_k = 0$ ).  $N(\mu_k, \Sigma_k)$  is a Gaussian distribution, describing the  
214 distribution of absorptions changes within the  $k^{th}$  parcel, when the parcel  
215 is considered as active ( $S_k = 1$ ). This prior model, which is specific to our  
216 MEM inference, offers a unique opportunity to switch off some parcels of the  
217 model, resulting in accurate spatial reconstructions of the underlying activity  
218 patterns with their spatial extent, as carefully studied and compared with  
219 other Bayesian methods in Chowdhury et al., 2013.

220 The spatial clustering of the cortical surface into  $K$  non-overlapping par-  
221 cel was obtained using a data driven parcellization (DDP) technique (La-  
222 palme et al., 2006). DDP consisted in first applying a projection method, the  
223 multivariate source prelocalization (MSP) technique (Mattout et al., 2005),  
224 estimating a probability like coefficient (MSP score) between 0 and 1 for each  
225 vertex of the cortical mesh, characterizing its contribution to the data. DDP  
226 is then obtained by using a region growing algorithm, along the tessellated  
227 cortical surface, starting from local MSP maxima. Once the parcellization is



228 done, the prior distribution  $d\nu(x)$  is then a joint distribution expressed as  
229 the multiplication of individual distribution of each parcel in Eq.9 assuming  
230 statistical independence between parcels,

$$231 \quad d\nu(x) = d\nu_1(q_1)d\nu_2(q_2)\dots d\nu_k(q_k)\dots d\nu_K(q_K) \quad (10)$$

232 where  $d\nu(x)$  is the joint probability distribution of the prior,  $d\nu_k(q_k)$  is the  
233 individual distribution of the parcel  $k$  described as Eq.9.

234 To initialize the prior in Eq.9,  $\mu_k$  which is the mean of the Gaussian  
235 distribution,  $N(\mu_k, \Sigma_k)$ , was set to zero.  $\Sigma_k$  at each time point  $t$ , i.e.  $\Sigma_k(t)$ ,  
236 was defined by Eq.11 according to (Chowdhury et al., 2013),

$$237 \quad \begin{aligned} \Sigma_k(t) &= \eta(t)W_k(\sigma)^T W_k(\sigma) \\ \eta(t) &= 0.05 \frac{1}{\mathcal{P}_k} \sum_{i \in \mathcal{P}_k} \hat{X}_{MNE}^2(i, t) \end{aligned} \quad (11)$$

238 where  $W_k(\sigma)$  is a spatial smoothness matrix, defined by (Friston et al., 2008),  
239 which controls the local spatial smoothness within the parcel according to  
240 the geodesic surface neighborhood order. Same value of  $\sigma = 0.6$  was used as  
241 in (Chowdhury et al., 2013).  $\eta(t)$  was defined as 5% of the averaged energy  
242 of MNE solution within each parcel  $\mathcal{P}_k$  at time  $t$ . Finally, we can substitute  
243 this initialization into Eq.9 to construct the prior distribution  $d\nu(x)$ , and  
244 then obtain the MEM solution using Eq.8.

245 It is worth mentioning that we did not use MNE solution as the prior  
246 of  $\mu_k$  in Eq.9 at all, which was actually initialized to 0 in our framework.  
247 We only used 5% of the averaged energy of MNE solution, over the parcel  
248  $k$ , to set the prior for covariance  $\Sigma_k$ . The posterior estimation of parameter  
249  $\mu_k$  was estimated from the Bayesian framework by conditioning with data.

250 Moreover, the prior of MEM framework is a mixture of activation probability  
251  $\alpha_k$  and a Gaussian distribution (see Eq.9), in which the prior for  $\alpha_k$  was  
252 informed by a spatio-temporal extension of the MSP score (see Chowdhury  
253 et al., 2013 for further details). These aspects completely differentiate MEM  
254 from approaches that iteratively update reconstruction results initialized by  
255 a MNE solution.

### 256 2.4.3. Depth weighted MEM

257 In addition to adapting MEM for fNIRS reconstruction, we also imple-  
258 mented for the first time, depth weighting within the MEM framework. Two  
259 depth weighting parameters,  $\omega_1$  and  $\omega_2$ , were involved in this process.  $\omega_1$   
260 was used to apply depth weighting on the source covariance matrix  $\Sigma_k$  of  
261 each parcel  $k$  in Eq.11.  $\omega_2$  was applied to solve the depth weighted MNE, as  
262 described in Eq.3, before using those prior to initialize the source covariance  
263 model within each parcel of the MEM model. Therefore, the standard MNE  
264 solution  $\hat{X}_{MNE}(i, t)$  in Eq.11 was replaced by the depth weighted version  
265 of MNE solution  $\hat{X}_{dMNE}(i, t)$  described by Eq.3. Consequently, the depth  
266 weighted version of  $\Sigma_k(t)$  is now defined as,

$$\begin{aligned} \Sigma_k(t)_{dw} &= \Lambda_{\mathcal{P}_k} \eta(t)_{dw} W_k(\sigma)^T W_k(\sigma) \\ \eta(t)_{dw} &= 0.05 \frac{1}{\mathcal{P}_k} \sum_{i \in \mathcal{P}_k} \hat{X}_{dMNE}^2(i, t) \end{aligned} \quad (12)$$

268 where  $\Lambda_{\mathcal{P}_k}$  is the depth weighting matrix for each parcel  $k$ , in which  $\omega_1$  was  
269 involved to construct this scaling matrix as described in Eq.3. This initial-  
270 ization followed the logic that depth weighting is in fact achieved by scaling  
271 the source covariance matrix. The other depth weighting parameter,  $\omega_2$ , was

272 considered when solving  $\hat{X}_{dMNE}(i, t)$ , therefore avoiding biasing the initial-  
273 ization of the source covariance with a standard MNE solution.

274 To comprehensively compare MEM and MNE and also to investigate the  
275 behavior of depth weighting, we first evaluated the reconstruction perfor-  
276 mance of MNE with different  $\omega_2$  (i.e. step of 0.1 from 0 to 0.9). Then two  
277 of these values (i.e.  $\omega_2 = 0.3$  and 0.5) were selected for the comparison with  
278 MEM since they performed better than the others. Note that the follow-  
279 ing expressions of depth weighted MEM will be denoted as  $\text{MEM}(\omega_1, \omega_2)$  to  
280 represent the different depth weighting strategies.

#### 281 2.4.4. Accuracy of temporal dynamics

282 The last contribution of this study was to improve the temporal accuracy  
283 of MEM solutions. In classical MEM approach (Chowdhury et al., 2013),  
284  $\hat{X}_{MNE}(i, t)$  in Eq.12 was globally normalized by dividing by  $\max_{i \in \Omega, t \in T}(\hat{X}_{MNE}(i, t))$ ,  
285 where  $\Omega$  represents all the possible locations along the cortical surface and  
286  $T$  is the whole time segment. Therefore, the constructed prior along the  
287 time actually contained the temporal scaled dynamics from MNE solution.  
288 To remove this effect, we performed local normalization for  $\hat{X}_{dMNE}(i, t)$  at  
289 each time instance  $t$ , i.e., by dividing by  $\max_{i \in \Omega}(\hat{X}_{dMNE}(i, t))$ . This new feature  
290 would preserve the spatial information provided by prior distribution, while  
291 allowing MEM to estimate the temporal dynamics only from the data.

#### 292 2.5. Validation of fNIRS reconstruction methods

293 We evaluated the performance of the two fNIRS reconstruction methods  
294 (i.e., MEM and MNE), first within a fully controlled environment involving  
295 the use of realistic simulations of fNIRS data, followed by evaluations on real

296 data acquired with a well controlled finger tapping paradigm. Two different  
297 fNIRS montages were considered in those two proposed evaluations.

298 **Montage 1:** A full Double Density (DD) montage (see Fig.1) which is  
299 a widely used fNIRS montage, was considered given that it allows sufficient  
300 dense spatial coverage of fNIRS channel to allow local DOT (Kawaguchi  
301 et al., 2007). One healthy subject underwent fNIRS acquisitions with this  
302 DD montage, involving the two following sessions,

- 303 • A 10 minutes resting state session was acquired to add realistic physi-  
304 ology noise to be considered in our realistic simulations. The subject was  
305 seating on a comfortable armchair and instructed to keep the eyes open  
306 and to remain awake. The optodes of the full DD montage (i.e. 8 sources  
307 and 10 detectors resulting in 50 fNIRS channels) are presented in Fig.1e.  
308 The montage composed of 6 second-order distance channels(1.5cm), 24  
309 third-order channels(3cm) and 12 fourth-order channels with 3.35cm  
310 distance. In addition, we also added one proximity detector paired for  
311 each source to construct close distance channels (0.7cm) in order to  
312 measure superficial signals within extra-cerebral tissues. To place the  
313 montage with respect to the region of interest, the center of the mon-  
314 tage was aligned with the center of the right "hand knob" area, which  
315 controls the left hand movement (Raffin et al., 2015), projected on the  
316 scalp surface and then each optodes were projected on the scalp surface  
317 (see Fig.1d).
- 318 • The subject was asked to sequentially tap the left thumb against the  
319 other digits around 2Hz, therefore the main elicited hemodynamic re-  
320 sponse was indeed expected over the right hand knob area. The finger

321 tapping paradigm consisted in 10 blocks of 30s tapping task and each  
322 of them was followed by a 30 to 35s resting period. The beginning/end  
323 of each block was informed by an auditory cue.

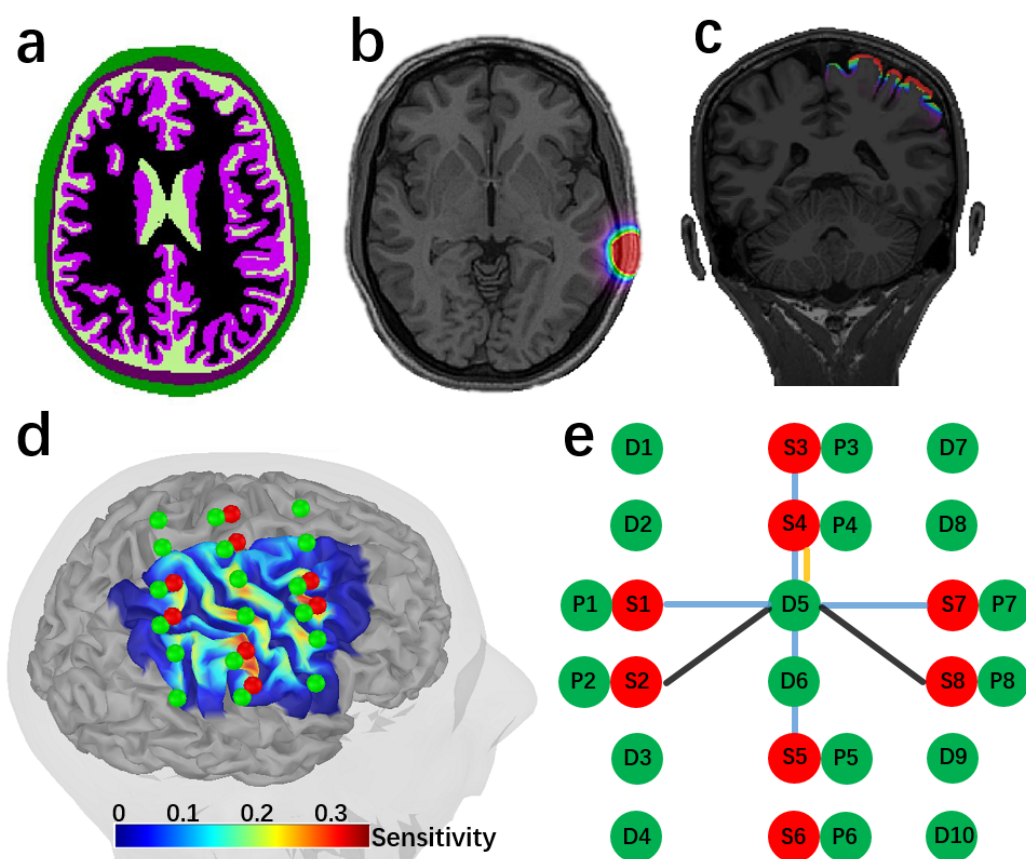

**Fig.1.** fNIRS measurement montage 1 and the anatomical model considered for DOT forward model estimation. (a) Anatomical 3D MRI segmented in five tissues, namely, scalp (green), skull (brown), CSF (light green), gray matter (purple) and white matter (black). (b) Optical fluence of one optode calculated through Monte Carlo simulation of Photons within this head model, using MCXLab. (c) Sensitivity profile of the whole montage in volume space. (d) Sensitivity profile, i.e. the summation of sensitivity map of all channels, along the cortical surface. Green dots represent detectors, including one proximity detector 0.7cm for each source, and red dots represent sources. (e) double-density montage 1 considered for this acquisition. There were 50 channels in total, 12 of 3.8 cm (black), 24 of 3 cm (blue), 6 of 1.5 cm (yellow) and 8 of close distance (0.7cm) channels.

324 **Montage 2:** A personalized optimal montage (see Fig.8) following the  
325 methodology we previously reported in Machado et al., 2018. First, the  
326 hand knob within right primary motor cortex was drawn manually along the  
327 cortical surface and defined as a target region of interest (ROI) using the  
328 Brainstorm software (Tadel et al., 2011). Then we applied optimal montage  
329 estimation (Machado et al., 2014, 2018) in order to estimate personalized  
330 montages, built to maximize a priori fNIRS sensitivity and spatial overlap  
331 between channels with respect to the target ROI. To ensure good spatial  
332 overlap between channels for local 3D reconstruction, we constructed person-  
333 alized optimal montages composed of 3 sources and 15 detectors (see Fig.7b).  
334 The source-detector distance was set to vary from  $2cm$  to  $4.5cm$  and each  
335 source was constrained such that it has to create channels with at least 13  
336 detectors. Finally, we also manually added 1 proximity channel, located at  
337 the center of the 3 sources. Five subjects underwent fNIRS acquisitions with  
338 personalized optimal montage during a similar finger tapping task as the one  
339 for montage 1, in which 20 blocks were acquired by alternating a task (period  
340 of  $10s$ ) and a resting state period ranging from  $30s$  to  $60s$ .

341 All 6 subjects have signed written informed consent forms for this study  
342 which was approved by the Central Committee of Research Ethics of the Min-  
343 ister of Health and Social Services Research Ethics Board, Québec, Canada.

#### 344 *2.5.1. MRI and fMRI Data acquisitions*

345 Anatomical MRI data were acquired on those 6 healthy subjects ( $25 \pm 6$   
346 years old, right-handed) and were considered to generate realistic anatomical  
347 head models. MRI data were acquired in a GE 3T scanner at the PERFORM  
348 Center of Concordia University, Montréal, Canada. T1-weighted anatomical

349 images were acquired using the 3D BRAVO sequence ( $1 \times 1 \times 1 \text{ mm}^3$ , 192  
350 axial slices,  $256 \times 256$  matrix), whereas T2-weighted anatomical images were  
351 acquired using the 3D Cube T2 sequence ( $1 \times 1 \times 1 \text{ mm}^3$  voxels, 168 sagittal  
352 slices,  $256 \times 256$  matrix).

353 Participants also underwent functional MRI acquisition (without fNIRS)  
354 while performing the same finger opposition tasks considered in fNIRS. fMRI  
355 acquisition consisted in a gradient echo EPI sequence ( $3.7 \times 3.7 \times 3.7 \text{ mm}^3$   
356 voxels, 32 axial slices, TE = 25 ms, TR = 2,000 ms). fMRI Z-maps were  
357 generated by standard first-level fMRI analysis using FEAT from FSL v6.0.0  
358 software (Smith et al., 2004; Jenkinson et al., 2012).

### 359 *2.5.2. fNIRS Data acquisition*

360 fNIRS acquisitions were conducted at the PERFORM Center of Con-  
361 cordia University using a Brainsight fNIRS device (Rogue Research Inc.,  
362 Montréal, Canada), equipped with 16 dual wavelength sources (685nm and  
363 830nm), 32 detectors and 16 proximity detectors (for short distance chan-  
364 nels). All montages (i.e., double density and optimal montages) were in-  
365 stalled to cover the right motor cortex. Knowing a priori the exact positions  
366 of fNIRS channels estimated on the anatomical MRI of each participant, we  
367 then used a 3D neuronavigation system (Brainsight TMS navigation system,  
368 Rogue Research Inc.) to guide the installation of the sensors on the scalp.  
369 Finally, every sensor was glued on the scalp using a clinical adhesive, collo-  
370 dion, to prevent motion and ensure good contact to the scalp (Yücel et al.,  
371 2014; Machado et al., 2018).



372 *2.5.3. fNIRS forward model estimation*

373 T1 and T2 weighted anatomical images were processed using FreeSurfer  
374 V6.0 (Fischl et al., 2002) and Brain Extraction Tool2 (BET2) (Smith et al.,  
375 2004) in FMRIB Software Library (FSL) to segment the head into 5 tissues  
376 (i.e. scalp, skull, Cerebrospinal fluid (CSF), gray matter and white matter  
377 see Fig.1a).

378 Same optical coefficients used in (Yücel et al., 2014; Machado et al., 2018)  
379 for the two wavelengths considered during our fNIRS acquisition,  $685nm$   
380 and  $830nm$ , were assigned to each tissue type mentioned above. Fluences  
381 of light for each optode (see Fig.1b) was estimated by Monte Carlo simula-  
382 tions with  $10^8$  photons using MCXLAB developed by Fang and Boas, 2009;  
383 Yu et al., 2018 (<http://mcx.sourceforge.net/cgi-bin/index.cgi>). Sen-  
384 sitivity values were then computed using the adjoint formulation and were  
385 normalized by the Rytov approximation (Arridge, 1999).

386 For each source-detector pair of our montages, the corresponding light  
387 sensitivity map was first estimated in a volume space, and then further con-  
388 strained to the 3D mask of gray matter tissue (see Fig.1c), as suggested in  
389 Boas and Dale, 2005. Then, these sensitivity values within the gray mat-  
390 ter volume were projected along the cortical surface (see Fig.1d and Fig.7c)  
391 using the Voronoi based method proposed by (Grova et al., 2006). We con-  
392 sidered the mid-surface from FreeSurfer as the cortical surface. This surface  
393 was downsampled to 25,000 vertices. This volume to surface interpolation  
394 method has the ability to preserve sulco-gyral morphology (Grova et al.,  
395 2006). After the interpolation, the sensitivity value of each vertex of the  
396 surface mesh represents the mean sensitivity of the corresponding volumetric

397 Voronoi cell (i.e., a set of voxels that have closest distances to a certain vertex  
398 than to all other vertices).

#### 399 *2.5.4. fNIRS data preprocessing*

400 Using the coefficient of variation of the fNIRS data, channels exhibiting a  
401 standard deviation larger than 8% of the signal mean were rejected (Schmitz  
402 et al., 2005; Schneider et al., 2011; Eggebrecht et al., 2012; Piper et al., 2014).  
403 Superficial physiological fluctuations were regressed out at each channel using  
404 the average of all proximity channels' (0.7cm) signals (Zeff et al., 2007). All  
405 channels were then band-pass filtered between 0.01Hz and 0.1Hz using a 3rd  
406 order Butterworth filter. Changes in optical density (i.e.,  $\Delta OD$ ) were calcu-  
407 lated using the conversion to log-ratio. Finally,  $\Delta OD$  of finger tapping data  
408 were block averaged around the task onsets. Note that since sensors were  
409 glued with collodion, we observed very minimal motion during the acquisi-  
410 tions. Real background signal considered to generate realistic simulations  
411 also underwent the same preprocessing.

#### 412 *2.5.5. Realistic Simulations of fNIRS Data*

413 We first considered realistic simulations of fNIRS data to evaluate DOT  
414 methods within a fully controlled environment. To do so, theoretical task-  
415 induced HbO/HbR concentration changes were simulated within cortical sur-  
416 face regions with a variety of locations, areas and depths. Corresponding  
417 optical density changes in the channel space were then computed by apply-  
418 ing the corresponding fNIRS forward model, before adding real resting state  
419 fNIRS baseline signal as realistic physiological noise at different signal to  
420 noise ratio (SNR) levels.

421 As presented in Fig.2a, we defined three sets of evenly distributed seeds  
422 within the field of view of DOT reconstruction. The locations were selected  
423 with respect to the depth relative to the skull, namely we simulated 100 "su-  
424 perfacial seeds", 100 "middle seeds" and 50 "deep seeds". The cortical regions  
425 in which we simulated an hemodynamic response were generated by region  
426 growing around those seeds, along the cortical surface. To simulate genera-  
427 tors with different spatial extents (denoted here as  $Se$ ), we considered four  
428 levels of neighborhood orders, growing geodesically along the cortical sur-  
429 face, resulting in spatial extents ranging from  $Se = 3, 5, 7, 9$  (corresponding  
430 areas of 3 to 40  $cm^2$ ). For simplification, these cortical regions within which  
431 an hemodynamic response was simulated will be denoted as "generators" in  
432 this paper. For each vertex within a "generator", a canonical Hemodynamic  
433 Response Function (HRF) was convoluted with a simulated experimental  
434 paradigm which consisted in one block of 20s task surrounded by 60s pre-  
435 /post- baseline period (Fig.2b). Simulated HbO/HbR fluctuations within  
436 the theoretical generator (Fig.2c) were then converted to the corresponding  
437 absorption changes of two wavelengths (i.e., 685nm and 830nm). After ap-  
438 plying the forward model matrix  $A$  in Eq.1, we estimated the simulated,  
439 noise free, task induced  $\Delta OD$  in all channels.

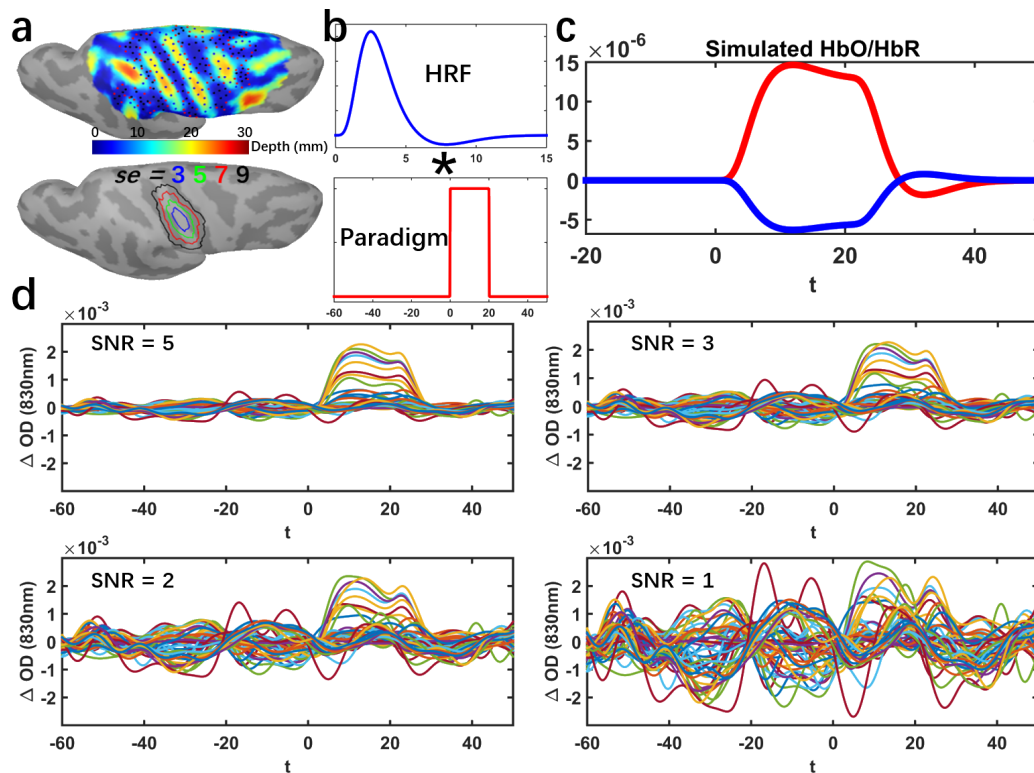

**Fig.2.** Workflow describing our proposed realistic fNIRS simulation framework. (a) 100 Superficial seeds (black dots), 100 Middle seeds (red dots), 50 Deep seeds (blue dots) with spatial extent of  $Se = 3, 5, 7, 9$  neighbourhood order within the field of view. (b) Convolution of a canonical HRF model with an experimental block paradigm (60s before and 50s after the onset). (c) Simulated theoretical HbO/HbR fluctuations along the cortical surface within the corresponding generator. (d) Realistic simulations obtained by applying the fNIRS forward model and addition of the average of 10 trials of real fNIRS background measurements at 830nm. Time course of  $\Delta OD$  of all channels with SNR of 5, 3, 2 and 1 respectively are presented

440  $\Delta OD$  of real resting state data were then used to add realistic fluctuations  
441 (noise) to these simulated signals. Over the 10min of recording, we randomly  
442 selected 10 baseline epochs of 120s each, free from any motion artifact by

443 visual inspection. To mimic a standard fNIRS block average response, realis-  
444 tic simulations were obtained by adding the average of these 10 real baseline  
445 epochs to the theoretical noise-free simulated  $\Delta OD$ , at five SNR levels (i.e.  
446  $SNR = 5, 3, 2, 1$ ). SNR was calculated through the following equation,

$$447 \quad SNR_{\lambda} = \frac{\max(abs(\Delta OD_{\lambda}[0, t_1]))}{\text{mean}(std(\Delta OD_{\lambda}[-t_0, 0]))} \quad (13)$$

448 where  $\Delta OD_{\lambda}[0, t_1]$  is the optical density changes of a certain wavelength  $\lambda$   
449 in all channels during the period from  $0s$  to  $t_1 = 60s$ .  $std(\Delta OD_{\lambda}[-t_0, 0])$   
450 is the standard deviation of  $\Delta OD_{\lambda}$  during baseline period along all chan-  
451 nels. Simulated trials for each of four different SNR levels are illustrated in  
452 Fig.2d. A total number of 4000 realistic simulations were considered for this  
453 evaluation study, i.e.,  $250$  (seeds)  $\times 4$  (spatial extents)  $\times 4$  (SNR levels). Note  
454 that resting state fNIRS baseline signal was preprocessed before adding to  
455 the simulated signals.

#### 456 *2.5.6. Validation metric*

457 Following the validation metrics described in (Grova et al., 2006; Chowd-  
458 hury et al., 2013, 2016; Hedrich et al., 2017), we applied 4 quantitative met-  
459 rics to assess the spatial and temporal accuracy of fNIRS 3D reconstructions.  
460 Further details on the computation of those four validation metrics are re-  
461 ported in Supplementary material S1.

- 462 • **Area Under the Receiver Operating Characteristic (ROC)**  
463 **curve (AUC)** was used to assess general reconstruction accuracy con-  
464 sidering both sensitivity and specificity. AUC score was estimated as  
465 the area under the ROC curve, which was obtained by plotting sensi-

466 tivity as a function of (1- specificity). AUC ranges from 0 to 1, the  
467 higher it is the more accurate the reconstruction is.

468 • **Minimum geodesic distance (Dmin)** measuring the geodesic dis-  
469 tance in millimeters, following the circumvolutions of the cortical sur-  
470 face, from the vertex that exhibited maximum of reconstructed activity  
471 to the border of the ground truth. Low Dmin values indicate better  
472 accuracy in estimating the location of the generator.

473 • **Spatial Dispersion (SD)** assessed the spatial spread of the estimated  
474 generator distribution and the localization error. It is expressed in mil-  
475 limeters. A reconstructed map with either large spatial spread around  
476 the ground truth or large localization error would result in large SD  
477 values.

478 • **Shape error(SE)** evaluated the temporal accuracy of the reconstruc-  
479 tion. It was calculated as the root mean square of the difference between  
480 the normalized reconstructed time course and the normalized ground  
481 truth time course. Low SE values indicate high temporal accuracy of  
482 the reconstruction.

## 483 *2.6. Statistics*

484 Throughout all of the quantitative evaluations among different methods  
485 involving different depth weighting factors  $\omega$  in the results section, Wilcoxon  
486 signed rank test was applied to test the significance of the paired differences  
487 between each comparison. For each statistical test, we reported the median  
488 value of paired differences, together with its p-value (Bonferroni corrected).

489 We are only showing results at 830nm for simulations, since the ones from  
490 690nm under the same SNR level would have provided similar reconstructed  
491 spatiotemporal maps except for the reversed amplitudes. However, recon-  
492 struction results on real data indeed involved both wavelengths.

### 493 **3. Results**

#### 494 *3.1. Evaluation of MEM v.s. MNE using realistic simulations*

495 We first investigated the effects of depth weighting factor  $\omega_2$  selection  
496 for depth weighted MNE. To do so, we evaluated spatial and temporal per-  
497 formances of DOT reconstruction for a set of  $\omega_2$  (step of 0.1 from 0 to 0.9).  
498 Based on those results reported in the Supplementary material S2 and Fig.S1,  
499 we decided to considered that most accurate fNIRS reconstructions were ob-  
500 tained when considering  $\omega_2 = 0.3$  and  $0.5$  for depth weighted MNE. Therefore  
501 only those two values were further considered for comparison with MEM re-  
502 constructions.

503 Comparison of the performance of MEM and MNE on superficial realistic  
504 simulations are presented in Table.1 and Fig.3, for 4 levels of spatial extent  
505 ( $Se = 3, 5, 7, 9$ ), using boxplot distribution of the 4 validation metrics. We  
506 evaluated 3 depth weighted implementations of MEM, namely, MEM( $\omega_1 =$   
507  $0.3, \omega_2 = 0.3$ ), MEM( $0.3, 0.5$ ) and MEM( $0.5, 0.5$ ), as well as 2 depth weighted  
508 implementations of MNE, namely, MNE( $0.3$ ) and MNE( $0.5$ ).

509 For spatial accuracy, results evaluated using Dmin, we obtained median  
510 Dmin values of  $0mm$  for all methods, indicating the peak of the reconstructed  
511 map, was indeed accurately localized inside the simulated generator. It is  
512 worth mentioning that MEM( $0.5, 0.5$ ) provided few Dmin values larger than

513  $0mm$  in  $Se = 3$  and  $Se = 5$  cases, which consisted of superficial and focal  
514 generators. Since MEM accurately estimated the spatial extent, more depth  
515 weighting considered for MEM(0.5,0.5) could result in focal and deeper  
516 reconstruction, hence resulting in non-zero  $D_{min}$  values. On the other hand,  
517 MNE would over-estimate the size of the underlying generators, therefore  
518 resulting in  $0mm$   $D_{min}$ , but larger SD values in similar conditions.

519 When considering the general reconstruction accuracy using AUC, for  
520 focal generators such as  $Se = 3$  and 5, we found significant larger AUC (see  
521 Table.1) for MEM(0.3,0.3) and MEM(0.3,0.5) when compared to the most  
522 accurate version of MNE, i.e., MNE(0.3). When considering more extended  
523 generators, i.e.,  $Se = 7$  and 9, MEM(0.3,0.5) and MEM(0.5,0.5) achieved  
524 significantly larger AUC than MNE(0.3). However, the AUC of MNE(0.5)  
525 was significantly larger than MEM(0.3,0.3) for  $Se = 7$  as well as significantly  
526 larger than MEM(0.3,0.5) and MEM(0.5,0.5) for  $Se = 9$ .

527 In terms of spatial extent of the estimated generator distribution and  
528 the localization error, MEM provided significantly smaller SD values among  
529 all the comparisons. Finally, for temporal accuracy of the reconstruction  
530 represented by SE, MNE provided significantly lower values, but with a small  
531 difference (e.g., 0.01 or 0.02, see results on real data as a reference of this  
532 effect size), than MEM among all comparisons when  $Se = 3, 5$ .



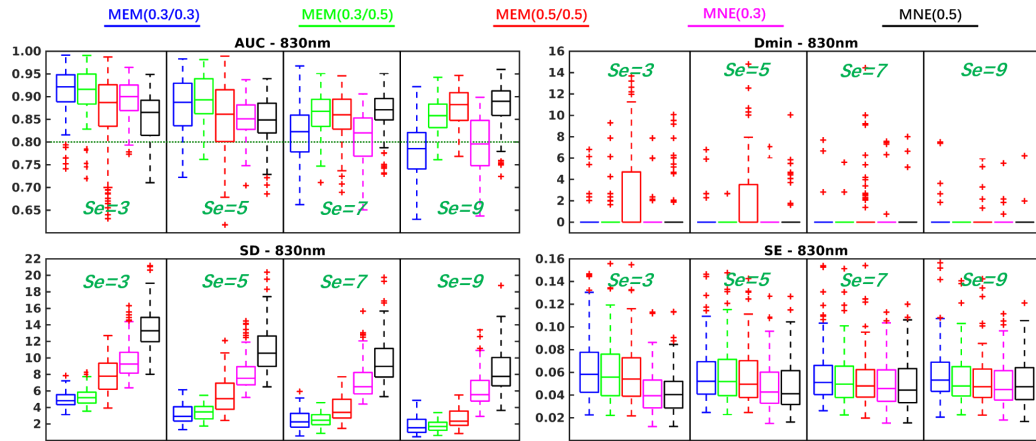

**Fig.3.** Evaluation of the performances of MEM and MNE using realistic simulations involving superficial seeds for different spatial extent ( $Se = 3, 5, 7, 9$ ). Boxplot representation of the distribution of four validation metrics for three depth weighted strategies of MEM and two depth weighted strategies of MNE, namely: MEM(0.3, 0.3) in blue, MEM(0.3, 0.5) in green, MEM(0.5, 0.5) in red, MNE(0.3) in magenta and MNE(0.5) in black. Results were obtained after DOT reconstruction of 830nm  $\Delta OD$ .

| Superficial Seeds |                | Se = 3    |           | Se = 5    |           | Se = 7    |           | Se = 9    |           |
|-------------------|----------------|-----------|-----------|-----------|-----------|-----------|-----------|-----------|-----------|
|                   |                | MNE (0.3) | MNE (0.5) | MNE (0.3) | MNE (0.5) | MNE (0.3) | MNE (0.5) | MNE (0.3) | MNE (0.5) |
| AUC               | MEM (0.3, 0.3) | 0.02*     | 0.06**    | 0.04**    | 0.03**    | 0.01      | -0.04**   | -0.01     | -0.10**   |
|                   | MEM (0.3, 0.5) | 0.02*     | 0.05**    | 0.05**    | 0.04**    | 0.05**    | 0.00      | 0.05**    | -0.03**   |
|                   | MEM (0.5, 0.5) | -0.01     | 0.03      | 0.00      | 0.01      | 0.04**    | 0.00      | 0.07**    | -0.01     |
| Dmin              | MEM (0.3, 0.3) | 0.00      | 0.00      | 0.00      | 0.00      | 0.00      | 0.00      | 0.00      | 0.00      |
|                   | MEM (0.3, 0.5) | 0.00      | 0.00      | 0.00      | 0.00      | 0.00      | 0.00      | 0.00      | 0.00      |
|                   | MEM (0.5, 0.5) | 0.00      | 0.00      | 0.00      | 0.00      | 0.00      | 0.00      | 0.00      | 0.00      |
| SD                | MEM (0.3, 0.3) | -4.26**   | -8.31**   | -4.48**   | -7.63**   | -4.16**   | -6.43**   | -3.85**   | -6.28**   |
|                   | MEM (0.3, 0.5) | -3.78**   | -8.23**   | -4.11**   | -7.11**   | -3.86**   | -6.30**   | -3.71**   | -6.24**   |
|                   | MEM (0.5, 0.5) | -1.64**   | -5.56**   | -2.60**   | -4.97**   | -2.90**   | -4.79**   | -2.84**   | -5.01**   |
| SE                | MEM (0.3, 0.3) | 0.02**    | 0.02**    | 0.01**    | 0.01**    | 0.01      | 0.01      | 0.01      | 0.01      |
|                   | MEM (0.3, 0.5) | 0.02**    | 0.02**    | 0.01**    | 0.01**    | 0.01      | 0.01      | 0.00      | 0.00      |
|                   | MEM (0.5, 0.5) | 0.02**    | 0.02**    | 0.01**    | 0.01**    | 0.00      | 0.00      | 0.00      | 0.00      |

**Table1.** Wilcoxon signed rank test results of reconstruction performance comparison of MEM and MNE in superficial seeds case. Median values of paired difference are presented in the table. p values were corrected for multiple comparisons using Bonferroni correction, \* indicates  $p < 0.01$  and \*\* represents  $p < 0.001$ . Median of the paired difference of each validation metrics is color coded as follows: green: MEM is significantly better than MNE, red: MNE is significantly better than MEM and gray: non-significance.

533 Similar comparison between MEM and MNE were conducted respectively  
 534 for middle seed simulated generators and deep seed simulated generators. Re-  
 535 sults were overall reporting similar trends when comparing MEM and MNE  
 536 methods for middle and deep seeds, and as expected more depth weighting  
 537 resulted in more accurate reconstructions (described in details in supplemen-  
 538 tary material, Fig.S2 and Table.S1 for middle seeds, Fig.S3 and Table.S2 for  
 539 deep seeds).

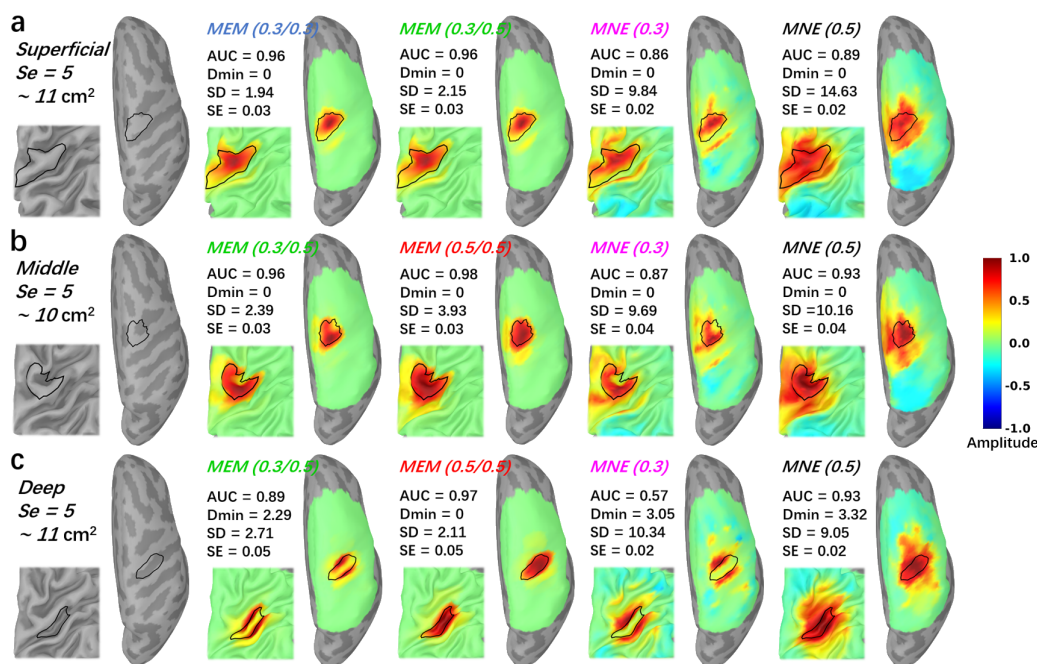

**Fig.4.** Comparisons of the reconstruction maps using MEM and MNE in realistic simulations. Three theoretical regions with spatial extent  $Se = 5$  ( $11 \text{ cm}^2$ ) were selected near the hand knob at different depth. The first column presents the locations and the size of the generator along the cortical surface. (a) Superficial seed case with reconstructed maps reconstructed using all MEM and MNE implementations considered in this study. (b) Middle seed case with reconstructed maps reconstructed using all MEM and MNE implementations considered in this study. (c) Deep seed case with reconstructed maps reconstructed using all MEM and MNE implementations considered in this study. 20% inflated and zoomed maps are presented on the left corner of each figure. 100% inflated right hemisphere are presented on the right side. All the maps were normalized by their own global maximum and no threshold was applied.

540 To further illustrate the performance of MEM and MNE as a function of  
 541 the depth of the generator, we are presenting some reconstruction results in  
 542 Fig.4. Three generators with a spatial extent of  $Se = 5$ , were selected for this

543 illustration. They were all located around the right "hand knob" area, and  
544 were generated from a superficial, middle and deep seed respectively. The  
545 first column in Fig.4 shows the location and the size of the simulated gener-  
546 ator, considered as our ground truth. The generator constructed from the  
547 superficial seed only covered the corresponding gyrus, whereas the generators  
548 constructed from the middle seed, included parts of the sulcus and the gyrus.  
549 Finally, when considering the deep seed, the simulated generator covered both  
550 walls of the sulcus, extended just a little on both gyri. For superficial case,  
551 MEM(0.3, 0.3) and MEM(0.3, 0.5) provided similar performances in term of  
552 visual evaluation of the results and quantitative evaluations ( $AUC = 0.96$ ,  
553  $D_{min} = 0mm$ ,  $SD = 1.94mm, 2.15mm$ ,  $SE = 0.03$ ). On the other hand,  
554 for the same simulations, MNE(0.3) and MNE(0.5) resulted in less accurate  
555 reconstructions, spreading too much around the true generator, as confirmed  
556 by validation metric, exhibiting notably large SD values ( $AUC = 0.86, 0.89$ ,  
557  $D_{min} = 0mm$ ,  $SD = 9.84mm, 14.63mm$ ,  $SE = 0.02$ ). When considering  
558 the simulation obtained with the middle seed, MEM(0.3, 0.5) retrieved accu-  
559 rately the gyrus part of the generator but missed the sulcus component, since  
560 less depth compensation was considered. When increasing depth sensitivity,  
561 MEM(0.5, 0.5) clearly outperformed all other methods, by retrieving both the  
562 gyrus and sulcus aspects of the generator, resulting in the largest  $AUC = 0.98$   
563 and the lowest  $SD = 2.93mm$ . MNE(0.3) was not able to recover the deep-  
564 est aspects of the generator, but also exhibited a large spread outside the  
565 ground truth area as suggested by a large  $SD = 9.69mm$ . MNE(0.5) was  
566 able to retrieve the main generator, but also exhibited a large spatial spread  
567 of  $SD = 10.16mm$ . When considering the generators obtained from the

568 deep seed, MNE(0.3) only reconstructed part of gyrus, missing completely  
569 the main sulcus aspect of the generator, resulting in low AUC of 0.57 and  
570 large SD of 10.34mm. MEM(0.3, 0.5) was not able to recover the deepest  
571 aspects of the sulcus, but reconstructed accurately the sulci walls, resulting  
572 in an AUC of 0.89 and a SD of 2.71mm. MEM(0.5, 0.5) recovered the deep  
573 simulated generator very accurately, as demonstrated by the excellent scores  
574 ( $AUC = 0.97$ ,  $SD = 2.11mm$ ) when compared to MNE(0.5). For those three  
575 simulations, all methods recovered the underlying time course of the activity  
576 with similar accuracy (i.e., similar SE values). In supplementary material,  
577 we added Video.1, illustrating the behavior of all the simulations and all  
578 methods, following the same layout provided in Fig.4.

579 Note that for this quantitative evaluation of fNIRS reconstruction meth-  
580 ods using realistic simulation framework, we considered fNIRS data at only  
581 one wavelength (830nm). Using single wavelength in the context simulation  
582 based evaluation is a common procedure in DOT literature (Zhan et al., 2012;  
583 Dehghani et al., 2009; White and Culver, 2010; Okawa et al., 2011; Trem-  
584 blay et al., 2018; Shimokawa et al., 2012, 2013), since we may expect overall  
585 similar performances for 685nm wavelength under the same SNR level.

586 *3.2. Effects of depth weighting on the reconstructed generator as a function*  
587 *of the depth and size of the simulated generators*

588 To summarize the effects of depth weighting in 3D fNIRS reconstructions,  
589 we further investigated the validation metrics, AUC, SD and SE, as a function  
590 of depth and size of the simulated generators. Dmin was not included due  
591 to the fact that we did not find clear differences among methods throughout  
592 all simulation parameters from previous results. In the top row of Fig.5,

593 250 generators created from all 250 seeds with a spatial extent of  $Se = 5$   
594 were selected to demonstrate the performance of different versions of depth  
595 weighting as a function of the average depth of the generator. Whereas in the  
596 bottom row of Fig.5, we considered 400 generators constructed from all 100  
597 superficial seeds with 4 different spatial extents of  $Se = 3, 5, 7, 9$ , to illustrate  
598 the performance of different versions of depth weighting as a function of  
599 the size of the generator. According to AUC, depth weighting was indeed  
600 necessary for all methods when the generator moved to deeper regions ( $>$   
601  $2cm$ ) as well as when the size was larger than  $20cm^2$ . Moreover, any version  
602 of MEM always exhibited clearly less false positives, as indicated by lower  
603 SD values, than all of MNE versions, whatever was the depth or the size of  
604 the underlying generator. We found no clear trend and difference of temporal  
605 accuracy among methods when reconstructing generators of different depths  
606 and sizes.

### 607 *3.3. Robustness of 3D reconstructions to the noise level*

608 All previous investigations were obtained from simulations obtained with  
609 a SNR of 5, in this section we compared the effect of the SNR level in Fig.6,  
610 on depth weighted versions of MNE and MEM, for superficial seeds only and  
611 generators of spatial extent  $Se = 5$ . We only compared MEM(0.3, 0.5) and  
612 MNE(0.5) considering the observation from previous results that these two  
613 methods were overall exhibiting best performances in this condition. Regarding  
614  $D_{min}$ , paired differences were not significant but MNE exhibited more  
615  $D_{min}$  values above  $0mm$  than MEM at all SNR levels, suggesting that MNE  
616 often missed the main generators while MEM was more accurate in recon-  
617 structing the maximum of activity within the simulated generator. Regarding

618 ing AUC, MEM(0.3, 0.5) exhibited values higher than 0.8 at all SNR levels,  
619 whereas MNE(0.5) failed to recover accurately the generator for  $SNR = 1$ .  
620 Besides, in Table.2, we found that difference of AUC between MEM and  
621 MNE increased when SNR level decreased, suggesting the good robustness  
622 of MEM when decreasing the SNR level. The difference of SD also increased  
623 when SNR levels decreased. Indeed, MEM exhibited stable SD values among  
624 most SNR levels (except  $SNR = 1$ ), whereas for MNE SD values were highly  
625 influenced by the SNR level. Finally, for both methods, decreasing SNR lev-  
626 els resulted in less accurate time course estimation (SE increased), slightly  
627 more for MEM when compared to MNE.

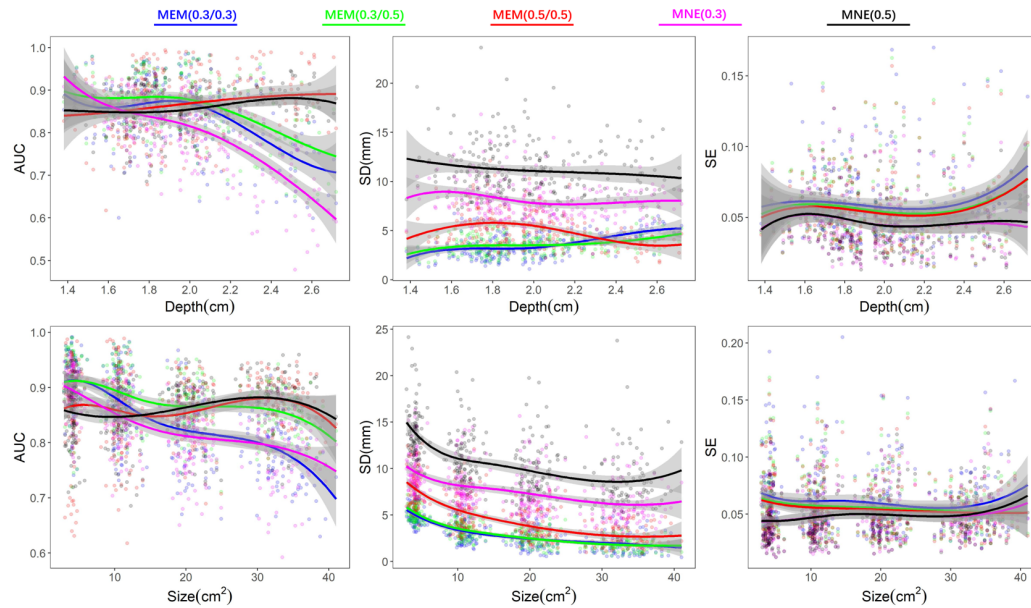

**Fig.5.** Effects of depth weighting on the depth and size of the simulated generators. First row demonstrates the validation matrices, AUC, SD and SE, as a function of depth of generators. We selected 250 generators created from all 250 seeds with a spatial extent of  $SD = 5$ . Depth was calculated by the average of minimum Euclidean distance from each vertex, within each generator, to the head surface. Second row demonstrates the validation matrices, AUC, SD and SE, as a function of size of generators. Involving 400 generators which constructed from 100 superficial seeds with 4 different spatial extend of  $Se = 3, 5, 7, 9$ . Line fittings were performed via a 4 knots spline function to estimate the smoothed trend and the shade areas represent 95% confident interval. Color coded points represent the values of validation matrices of all involved generators.



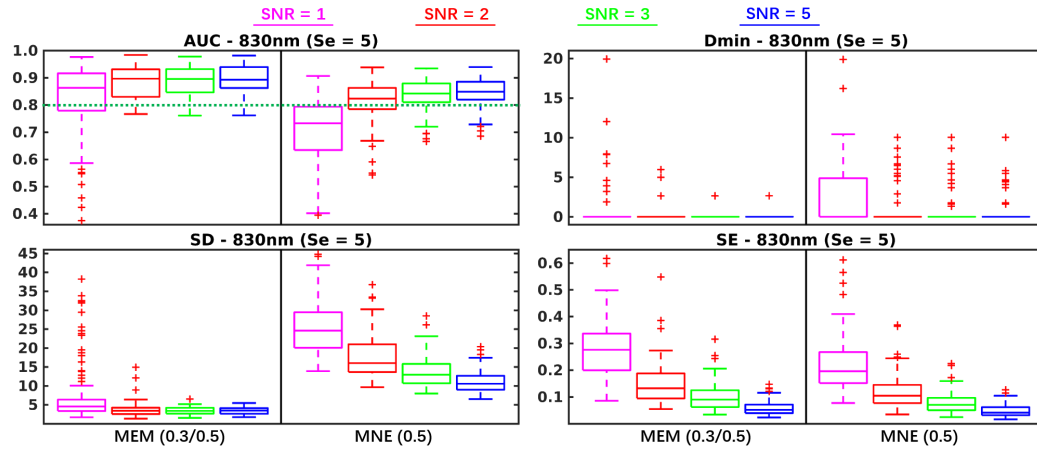

**Fig.6.** Evaluation of the performances of MEM and MNE at four different SNR levels. Boxplot representation of the distribution of four validation metrics for MEM(0.3,0.5) and MNE(0.5) involving superficial seeds with spatial extent  $Se = 5$ . SNR levels ( $SNR = 1, 2, 3, 5$ ) are represented using different colors.

| $Se = 5$ ( $\sim 11 \text{ cm}^2$ ) |                | SNR = 1   | SNR = 2   | SNR = 3   | SNR = 5   |
|-------------------------------------|----------------|-----------|-----------|-----------|-----------|
|                                     |                | MNE (0.5) | MNE (0.5) | MNE (0.5) | MNE (0.5) |
| AUC                                 | MEM (0.3, 0.5) | 0.14**    | 0.07**    | 0.05**    | 0.04**    |
| Dmin                                | MEM (0.3, 0.5) | 0.00      | 0.00      | 0.00      | 0.00      |
| SD                                  | MEM (0.3, 0.5) | -17.63**  | -12.40**  | -9.22**   | -7.11**   |
| SE                                  | MEM (0.3, 0.5) | 0.05**    | 0.03**    | 0.02**    | 0.01**    |

**Table.2.** Reconstruction performance comparison of MEM and MNE with different SNR levels. Median of paired difference of validation metric (i.e. AUC, Dmin, SD and SE) values of  $Se = 5$  are presented in the table following the SNR increase from 1 to 5. \*\* indicates corrected  $p < 0.001$ .

628 *3.4. Evaluation of MEM and MNE on real fNIRS data*

629 For all finger tapping fNIRS data considered in our evaluations, two  
630 wavelength (i.e., 685nm and 830nm) were reconstructed first and then con-  
631 verted to HbO/HbR concentration changes along cortical surface using spe-  
632 cific absorption coefficients. All the processes from fNIRS preprocessing to  
633 3D reconstruction were completed in Brainstorm (Tadel et al., 2011) us-  
634 ing the NIRSTORM plugin developed by our team ([https://github.com/](https://github.com/Nirstorm)  
635 `Nirstorm`). For full double density montage (montage 1), reconstructed HbR  
636 amplitudes were reversed to positive phase and normalized to their own  
637 global maximum, to facilitate comparisons. In Fig.7.a, we showed the re-  
638 constructed HbR maps at the peak of the time course (i.e., 31s) for MEM  
639 and MNE by considering the 4 depth weighted versions, previously evalu-  
640 ated, i.e., MEM(0.3, 0.3), MEM(0.3, 0.5), MNE(0.3) and MNE(0.5). The  
641 two depth weighted versions of MEM clearly localized well the "hand knob"  
642 region, while exhibiting very little false positives in its surrounding. On the  
643 other hand, both depth weighted version of MNE clearly overestimated the  
644 size of the hand knob region and were also exhibiting some distant possibly  
645 spurious activity. The fMRI Z-map obtained during the corresponding fMRI  
646 task is presented on Fig.7.b, after projection of the volume Z-map on the  
647 cortical surface. Fig.7.c showed the time courses within the region of inter-  
648 est representing the "hand knob". Each curve represents the reconstructed  
649 time course of one vertex of the hand knob region and the amplitude were  
650 normalized by the peak value within the whole region.

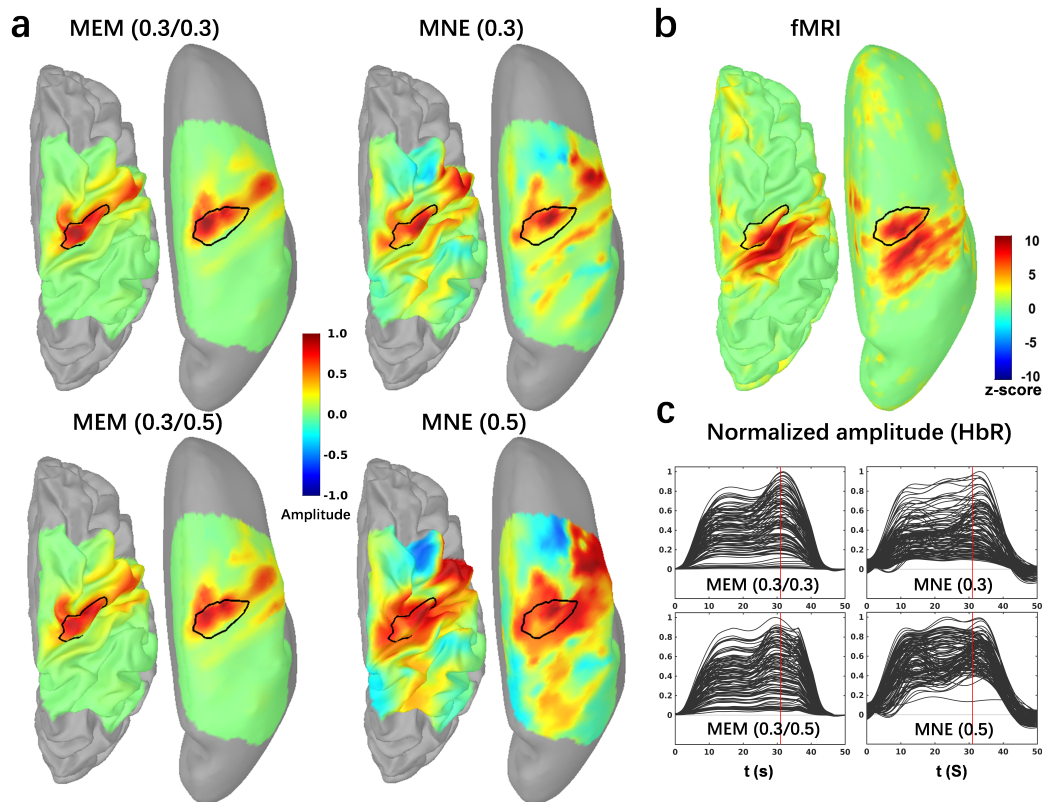

**Fig.7.** Application of MEM versus MNE reconstruction of HbR during a finger tapping task on one healthy subject. (a) Reconstructed maps of HbR (e.g. 20% inflation on the left and 100% inflation on the right side.) from MEM and MNE with different depth compensations. Each map was normalized by its own global maximum. (b) fMRI Z-map results projected along the cortical surface. (c) Reconstructed time courses of HbR within the hand knob region from MEM and MNE. Note that the hand knob region, represented by the black profile, was also matched well with the mean cluster of fMRI activation map on primary motor cortex. No statistical threshold was applied on fNIRS reconstructions.

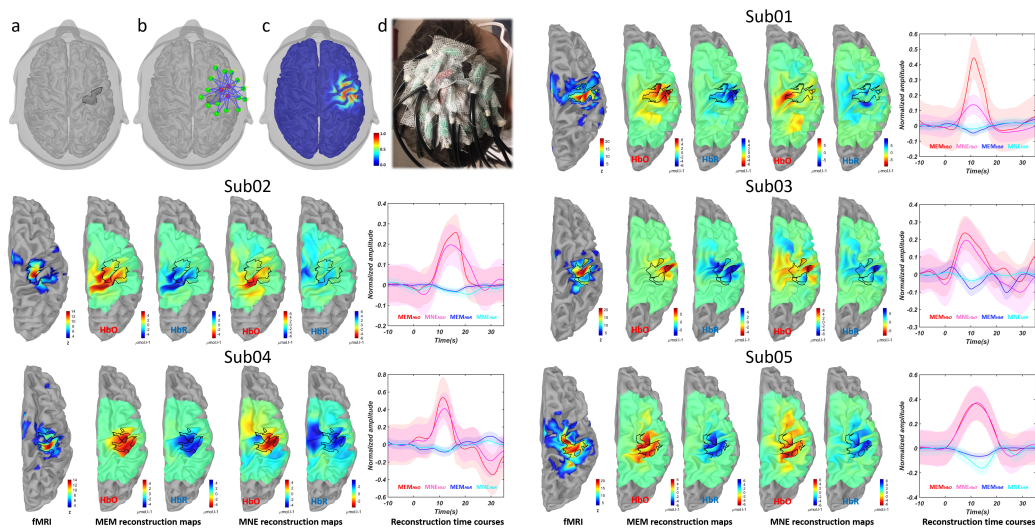

**Fig.8.** Personalized fNIRS montage and comparisons between MEM and MNE reconstructions with respect to fMRI Z-map at individual level. a) the region of interest defined as the hand knob, b) optimal montage targeting the ROI consisting 3 sources (red) and 15 detectors (green) and one proximity (in the center of sources not shown), c) normalized sensitivity profile of the optimal montage which calculated as the sum of all channels sensitivity along the cortical surface, d) optimal montage glued on the scalp of the one subject, using collodion. fMRI Z-map of each subject during finger tapping task (threshold with  $Z > 3.1$ , Bonferroni corrected), black profile represents the main cluster along M1 and S1. MEM reconstruction maps at the corresponding HbO/HbR peak times, using depth weighted option 0.3, 0.3. MNE reconstruction maps, at the corresponding HbO/HbR peak times, using depth weighted option 0.3. Reconstructed time courses within the black profile, solid lines represent the main time courses and the shade areas represent standard deviation within the region of interest. Reconstructed time courses were normalized by the maximum amplitude, for each method respectively, before averaging.

651 Results obtained on 5 subjects for acquisition involving personalized op-  
652 timal fNIRS montage (montage 2) and corresponding fNIRS reconstructions  
653 are presented in Fig.8. For every subject, fMRI Z-maps are presented along

654 the left hemisphere only and thresholded at  $Z > 3.1$  ( $p < 0.01$ , corrected us-  
655 ing Gaussian random field theory), The most significant fMRI cluster along  
656 M1 and S1 was delineated using a black profile. Reconstruction maps at  
657 the corresponding HbO/HbR peaks are then presented. Similar accuracy  
658 between MEM and MNE, with good overlap with fMRI results, were found  
659 for subjects 4 and 5, while MNE was overestimating the spatial extent of the  
660 generator. For subject 1, 2 and 3, MNE exhibited poor spatial correspon-  
661 dence with fMRI results. Averaged reconstructed time courses within the  
662 fMRI main cluster region are shown with standard deviation as the error bar.  
663 Comparing to simulations results, MEM exhibited overall very similar time  
664 course estimations than MNE in all cases. Considering the task duration was  
665 10s, the reconstructed peak timing of HbO/HbR appeared accurately within  
666 the range of 10s to 20s.

## 667 4. Discussion

### 668 4.1. Spatial accuracy of 3D fNIRS reconstruction using MEM

669 In the present study, we first adapted the MEM framework in the context  
670 of 3D fNIRS reconstruction and extensively validated its performance. The  
671 spatial performance of reconstructions can be considered in two aspects, 1)  
672 correctly localizing the peak of the reconstructed map close enough to the  
673 ground truth area, 2) accurately recovering the spatial extent of the gener-  
674 ator. According to our comprehensive evaluations of the proposed depth-  
675 weighted implementations of MEM and MNE methods, accurate localization  
676 was overall not difficult to achieve as suggested by our results using Dmin  
677 metric. Almost all methods provided median value of Dmin to be 0mm in all

678 simulation conditions except for the lowest  $SNR = 1$  condition where more  
679 localization error was found. On the other hand, recovering the actual spatial  
680 extent of the underlying generator is actually the most challenging task in  
681 fNIRS reconstruction. When considering the results of MNE on both real-  
682 istic simulations and real finger tapping tasks, either from visual inspection  
683 (Fig.4, Fig.7 and Fig.8) or quantitative evaluation by SD (Fig.3, Table.1 and  
684 supplementary section S2), we found that MNE overall reconstructed well  
685 the main generator but largely overestimated the size of the underlying gen-  
686 erator. MEM was specifically developed, in the context of EEG/MEG source  
687 imaging, as a method able to recover the spatial extent of the underlying gen-  
688 erators, which has been proved not to be the case for MNE-based approaches  
689 (Chowdhury et al., 2013, 2016; Grova et al., 2016; Hedrich et al., 2017; Pelle-  
690 grino et al., 2020). A recent review (Sohrabpour and He, 2021) in the context  
691 of EEG/MEG source imaging has also demonstrated that the Bayesian ap-  
692 proach with sparsity constraints is required to accurately estimate the spatial  
693 extent. These important properties of MEM was successfully demonstrated  
694 in our results on fNIRS reconstructions. These excellent performances were  
695 reliable for different sizes and depths of simulated generators, and for real  
696 finger tapping fNIRS data as well.

#### 697 *4.2. Importance of depth weighting in 3D fNIRS reconstruction*

698 Biophysics models of light diffusion in living tissue are clearly demon-  
699 strating that, at all source-detector separations, light sensitivity decreases  
700 exponentially with depth (Strangman et al., 2013). The general solution to  
701 grant the ability of depth sensitivity compensation in fNIRS reconstruction  
702 is to introduce depth weighting during the reconstruction. In this study, we

703 investigated the impact of depth weighting effects on fNIRS reconstruction,  
704 as a function of the location and the spatial extent of the underlying gener-  
705 erators. Our results are showing that when considering little or no depth  
706 weighting ( $\omega = 0.0$  and  $0.1$ ) only most superficial generators along the gyral  
707 crown were accurately reconstructed missing the deepest parts, therefore re-  
708 sulting in low AUC values. On the other hand, larger depth weighted values,  
709  $\omega = 0.7$  and  $0.9$ , would bias too much the importance of deep generators  
710 and consequently, the most superficial aspects of the underlying generators  
711 were not recovered. According to our detailed evaluation on MNE reported  
712 in Fig.S1, depth weighted values of  $\omega = 0.3$  and  $0.5$  were considered as good  
713 candidates to offer an ideal trade off. As expected, MNE(0.5) reported larger  
714 spatial dispersion around the true generator, than MNE(0.3). Depth weight-  
715 ing was also important when recovering more extended generators ( $> 20cm^2$ ,  
716 Fig.5), for both MNE and MEM, since those extended generators were actu-  
717 ally involving both superficial and deep regions.

#### 718 *4.3. Implementation of depth weighting strategy within the MEM framework*

719 In this study, we are proposing for the first time a depth weighting strat-  
720 egy within the MEM framework, by introducing two parameters:  $\omega_1$  acting  
721 on scaling the source covariance matrix, and  $\omega_2$  tuning the initialization of  
722 the reference for MEM. When compared to depth weighted MNE, the MEM  
723 framework demonstrated its ability to reconstruct, different depth of focal  
724 generators as well as larger size generators, exhibiting excellent accuracy and  
725 few false positives (see Fig.5). When considering deeper focal generators  
726 (*depth*  $> 2cm$ ), MEM(0.5,0.5) clearly outperformed all other methods (see  
727 AUC and SD values in Fig 5). In summary, for a large range of depths and



728 spatial extents of the underlying generators, MEM methods exhibited ac-  
729 curate results (large AUC values) and less false positives (lower SD values)  
730 when compared to MNE methods.

731 In practice, we would suggest to consider either  $\omega_2 = 0.3$  or  $0.5$  for the ini-  
732 tialization of MEM in all cases and only tune  $\omega_1$ . This is due to the fact that  
733 MNE( $0.3$  or  $0.5$ ) provided a generally good reconstruction with larger true  
734 positive rate in most scenarios, therefore providing MEM an accurate refer-  
735 ence model ( $d\nu(x)$ ) to start with. Even when considering the most focal sim-  
736 ulated generators ( $Se = 3$ ) case (see Fig.3, Table.1 and Fig.5), MEM( $0.3, 0.3$ )  
737 and MEM( $0.3, 0.5$ ) were actually exhibiting very similar performances. Our  
738 proposed suggestion to tune  $\omega_1$  and  $\omega_2$  parameters was actually further con-  
739 firmed when considered results obtained from real data. For both montages,  
740 MEM( $0.3, 0.3$ ) results in excellent spatial agreement with fMRI Z-maps.

741 Note that depth weighting was also considered in DOT studies using MNE  
742 (Culver et al., 2003; Zeff et al., 2007; Deghani et al., 2009; White et al., 2009;  
743 Eggebrecht et al., 2012, 2014) and a hierarchical Bayesian DOT algorithm  
744 (Shimokawa et al., 2012, 2013; Yamashita et al., 2016). A spatially-variant  
745 regularization parameter  $\beta$  was added to a diagonal regularization matrix  
746 featuring the sensitivity of every generator (forward model), and the value  
747 of  $\beta$  was tuned according to the sensitivity value of a certain depth. In  
748 practice, this strategy would result in similar depth compensation as ours,  
749 but we preferred the depth weighting parameter  $\omega$  which mapped the amount  
750 of compensation from 0 to 1 (as described in Eq.3) for easier interpretation  
751 and comparison. This is also a standard procedure introduced in EEG/MEG  
752 source localization studies (Fuchs et al., 1999; Lin et al., 2006). Finally, using



753 the depth weighted MNE solution as the prior is a common consideration in  
754 Hierarchical Bayesian framework based fNIRS reconstructions (Shimokawa  
755 et al., 2012, 2013; Yamashita et al., 2016)

#### 756 *4.4. Temporal accuracy of 3D fNIRS reconstruction using MEM*

757 Another important contribution of this study was that we improved the  
758 temporal accuracy time courses estimated within the MEM framework, re-  
759 sulting in similar temporal accuracy the one obtained with MNE. For in-  
760 stance, the largest significant SE difference between MEM and MNE was only  
761 0.02 for  $Se = 3$  and 0.01 for  $Se = 5$ . Corresponding time course estimations  
762 are also reported for MEM and MNE in real data (Fig.7 and Fig.8), suggest-  
763 ing again very similar performances. For instance, SE between MEM and  
764 MNE HbO time course was estimated as 0.02 for *Sub05* in Fig.8. Moreover,  
765 we found no significant SE differences between MEM and MNE for more ex-  
766 tended generators ( $Se = 7,9$ ). These findings are important considering that  
767 MNE is just a linear projection therefore the shape of the reconstruction will  
768 directly depend on the averaged signal at the channel level. On the other  
769 hand, MEM is a nonlinear technique, applied at every time sample, which is  
770 not optimized for the estimation of resulting time courses.

#### 771 *4.5. Robustness of fNIRS reconstructions to the noise level*

772 To further investigate the effects of the amount of realistic noise in our  
773 reconstructions on both reconstruction methods, we performed the compar-  
774 isons along 4 different SNR levels, i.e.,  $SNR = 1, 2, 3, 5$ . As shown in Fig.6  
775 and Table.2, we found that MEM was overall more robust than MNE when  
776 dealing with simulated signals at lower SNR levels. This is actually a very

777 important result since when reconstructing HbO/HbR responses, one has to  
778 consider at least two  $\Delta OD$  of two different wavelengths exhibiting different  
779 SNR levels. For the simulation results, we reported reconstruction results  
780 obtained from  $830nm$  data, whereas when considering real data (Fig.7 and  
781 Fig.8), we had to convert the reconstruction absorption changes at  $685nm$   
782 and  $830nm$  into HbO/HbR concentration changes. Therefore, our final re-  
783 sults were influenced by the SNR of all involved wavelengths.

784 fNIRS is inherently sensitive to inter-subject variability (Novi et al.,  
785 2020), as also suggested in our application on real data presented in Fig.8.  
786 Data from *Sub05* were exhibiting a good SNR level and therefore both MEM  
787 and MNE reconstructed accurately the main cluster of the activation, while  
788 MNE presented more spatial spread and false positive activation outside the  
789 fMRI ROI. When considering subjects for whom we obtained lower SNR  
790 data, e.g., *Sub02* and *Sub03*, MEM still recovered an activation map similar  
791 to fMRI map. In those cases, MNE not only reported suspicious activation  
792 pattern but also incorrectly reconstruct the peak amplitude outside the fMRI  
793 ROI. Our results suggesting MEM robustness in low SNR conditions for DOT  
794 are actually aligned with similar findings suggested for EEG/MEG source  
795 imaging, when considering source localization of single trial data (Chowd-  
796 hury et al., 2018; Aydin et al., 2020).

#### 797 *4.6. Comprehensive evaluation and comparison of the reconstruction perfor-* 798 *mance using MEM and MNE*

799 To perform a detailed evaluation of our proposed fNIRS reconstructions  
800 methods, we developed a fully controlled simulation environment, similar to  
801 the one proposed by our team to validate EEG/MEG source localization

802 methods (Chowdhury et al., 2013, 2016; Hedrich et al., 2017). The fNIRS  
803 resting state data, acquired by the same montage (montage1) and under-  
804 went the same preprocessing as conducted for the real data, was added to  
805 the simulated true hemodynamic response for each channel. Indeed such en-  
806 vironment provided us access to a ground truth, which is not possible when  
807 considering real fNIRS data set. Previous studies validated tomography re-  
808 sults (Eggebrecht et al., 2014; Yamashita et al., 2016) by comparing with  
809 fMRI activation map which can indeed be considered as a ground truth, but  
810 only for well controlled and reliable paradigms. Since fMRI also measures  
811 a signal of hemodynamic origin, it is reasonable to check the concordance  
812 between fMRI results and DOT reconstructions. Therefore, as preliminary  
813 illustrations, we also compared our MEM and MNE results to fMRI Z-maps  
814 obtained during finger tapping tasks on 6 healthy participants, suggesting  
815 overall excellent performances of MEM when compared to MNE. Further  
816 quantitative comparison between fMRI and fNIRS 3D reconstruction, was  
817 out of the scope of this paper and will be considered in future studies.

#### 818 *4.7. Sampling size of fNIRS reconstructions*

819 As opposed to several other fNIRS tomography studies that reconstruct  
820 fNIRS responses within a 3D volume space, here we proposed to use the  
821 mid-cortical surface as anatomical constraint to guide DOT reconstruction.  
822 However, the maximum spatial resolution of our surface based reconstruction  
823 was similar to the volume based one. Indeed, DOT reconstruction within a  
824 volume space usually down-sampled light sensitivity maps to either  $2 \times 2 \times$   
825  $2 \text{ mm}^3$  (Eggebrecht et al., 2014),  $3 \times 3 \times 3 \text{ mm}^3$  (Eggebrecht et al., 2012)  
826 or  $4 \times 4 \times 4 \text{ mm}^3$  (Yamashita et al., 2016) matrices, resulting in the down-

827 sampled voxel volume ranging from  $8\text{mm}^3$  to  $64\text{mm}^3$ . In our case, when  
828 projecting from volume space into cortical surface space, a unique set of  
829 voxels were assigned to each vertex along the cortical surface according to  
830 the Voronoi based projection method (Grova et al., 2006). Considering the  
831 mid-surface resolution (i.e., 25,000 vertices) used in this study, the average  
832 volume of a Voronoi cell was  $25\text{mm}^3$ , which falls in the above volume range.  
833 Therefore, we can conclude that both volume-based and surface-based fNIRS  
834 reconstructions as implemented here would result in similar sampling of the  
835 reconstruction space.

#### 836 *4.8. fNIRS montage for 3D reconstructions*

837 In previous reported studies (Zeff et al., 2007; White and Culver, 2010;  
838 Zhan et al., 2012; Eggebrecht et al., 2012, 2014), a high density montage  
839 was considered which was proved to be able to provide high spatial resolu-  
840 tion and robustness to low SNR conditions (White and Culver, 2010). In  
841 the present study, we first considered a full double density montage, as pro-  
842 posed in (Kawaguchi et al., 2007), to generate realistic simulations, and then  
843 analyzed finger tapping results on real data acquired on one subject. Dou-  
844 ble density montages have been involved in several inverse modelling studies  
845 such as (Kawaguchi et al., 2004; Sakakibara et al., 2016; Machado et al.,  
846 2018). We also illustrated, in 5 other subjects, MEM performance when  
847 considering real data set acquired by optimal montages, exhibiting a large  
848 amount of local spatial overlap between channels. In this case, probe design  
849 was optimized to maximize the sensitivity to the hand knob ROI, while also  
850 ensuring sufficient spatial overlap between sensors (e.g., at least 13 detectors  
851 had to construct channels with each of the three sources, and the channel

852 distance was ranging from  $2cm$  to  $4.5cm$ , see Fig.8a). We have previously  
853 demonstrated in Machado et al., 2018 that even if high density montages are  
854 usually considered as a gold standard for DOT reconstruction, personalized  
855 optimal montages (Machado et al., 2014, 2018, 2021) have ability to allow  
856 accurate reconstructions along the cortical surface. Finally, evaluating the  
857 performance of MEM when considering high density fNIRS montage would  
858 be of great interest but was out of the scope of this present study.

#### 859 *4.9. Availability of the proposed MEM framework*

860 Several software packages have been proposed to provide fNIRS recon-  
861 struction pipelines, as for instance NeuroDOT (Eggebrecht et al., 2014, 2019),  
862 AtlasViewer(Aasted et al., 2015) and fNIRS-SPM(Ye et al., 2009). To en-  
863 sure an easy access of our MEM methodology to the fNIRS community, we  
864 developed and released a fNIRS processing toolbox - NIRSTORM ([https:](https://github.com/Nirstorm)  
865 [//github.com/Nirstorm](https://github.com/Nirstorm)), as a plugin of Brainstorm software (Tadel et al.,  
866 2011), which is a renown software package dedicated for EEG/MEG analysis  
867 and source imaging. Our package NIRSTORM offers standard preprocessing,  
868 analysis and visualization as well as more advanced features such as person-  
869 alized optimal montage design, access to forward model estimation using  
870 MCXlab(Fang and Boas, 2009; Yu et al., 2018) and the MNE and MEM  
871 implementations considered in this study.

#### 872 *4.10. Limitations and Perspectives*

873 Previously, Tremblay et al., 2018 had comprehensively compared a variety  
874 of fNIRS reconstruction methods using large number of realistic simulations.  
875 Since introducing MEM was our main goal of this study, we did not consider

876 such wide range of methodological comparisons. We decided to carefully com-  
877 pare MEM with MNE since MNE remains the main method considered for  
878 DOT, and is available in several software packages. As suggested in Tremblay  
879 et al., 2018, DOT reconstruction methods based on Tikhonov regularization,  
880 such as least square regularization in MNE, usually allow great sensitivity,  
881 but performed poorly in term of spatial extent - largely overestimating the  
882 size of the underlying generator. On the other hand, L1-based regularization  
883 (Süzen et al., 2010; Okawa et al., 2011; Kavuri et al., 2012; Prakash et al.,  
884 2014) could achieve more focal solutions with high specificity but much lower  
885 sensitivity. As demonstrated in our results, the proposed MEM framework  
886 allows reaching good sensitivity and accurate reconstruction of the spatial  
887 extent of the underlying generator. Bayesian model averaging (BMA) origi-  
888 nally proposed for EEG source imaging by Trujillo-Barreto et al., 2004, also  
889 allows accurate DOT reconstructions with less false positives when compared  
890 to MNE. Similarly, we carefully compared MEM to Bayesian multiple priors  
891 approaches in Chowdhury et al., 2013 in the context of MEG source imag-  
892 ing. Comparing MEM with more advanced DOT reconstruction methods,  
893 including also the one proposed by Yamashita et al., 2016, would be of great  
894 interest but was out of the scope of this study.

895 Overall the main advantage of the MEM framework is its flexibility. Since  
896 the core structure of the MEM framework is to provide a unique reconstruc-  
897 tion map by maximizing the entropy relative to a reference source distribu-  
898 tion, one could implement its own reference for specific usage. For instance,  
899 as considered in the present study, the reference distribution considered the  
900 depth weighting MNE solution and spatial smoothing to inform our prior

901 model for MEM. Note that in this study we applied MEM independently for  
902 the two wavelengths and then calculated HbO/HbR concentration changes  
903 after reconstruction, whereas one could directly solve HbO/HbR concentra-  
904 tion changes along with reconstructions. Such procedure has been suggested  
905 by Li et al., 2004, by incorporating signals from the two wavelength within the  
906 same DOT reconstruction model. In the future, the MEM framework would  
907 allow to easily implement such a fusion model, as suggested by Chowdhury  
908 et al., 2015 in the context of MEG/EEG fusion algorithms. We have shown  
909 that MEM-based EEG/MEG fusion allows higher reliability in the source  
910 imaging results (Chowdhury et al., 2018), we will consider such an approach  
911 to estimate directly HbO/HbR fluctuations from the two wavelengths signals.

912 Finally, considering the main contribution of this study was to intro-  
913 duce the MEM framework for 3D fNIRS reconstruction, we decided to first  
914 carefully evaluate the performance of MEM, using well controlled realistic  
915 simulations. We also included few real data set reconstructions to illustrate  
916 the performance of the MEM reconstruction, whereas quantitative evaluation  
917 of MEM reconstructions on larger database will be considered in our future  
918 investigations.

## 919 **5. Conclusion**

920 In this study, we introduced a new fNIRS reconstruction method enti-  
921 tled Maximum Entropy on the Mean (MEM). We first implemented depth  
922 weighting into MEM framework and improved its temporal accuracy. To  
923 carefully validate the method, we applied a large number ( $n = 4000$ ) of real-  
924 istic simulations with various spatial extents and depths. We also evaluated

925 the robustness of the method when dealing with low SNR signals. The com-  
926 parison of the proposed method with the widely used depth weighted MNE  
927 was performed by applying four different quantification validation metrics.  
928 We found that MEM framework provided accurate and robust reconstruction  
929 results, relatively stable for a large range of spatial extents, depths and SNRs  
930 of the underlying generator. Moreover, we implemented the proposed method  
931 into a new fNIRS processing plugin - NIRSTORM in Brainstorm software to  
932 provide the access of the method to users for applications, validations and  
933 comparisons.

#### 934 **Acknowledgments**

935 This work was supported by the Natural Sciences and Engineering Re-  
936 search Council of Canada Discovery Grant Program (CG and JML) and  
937 an operating grant from the Canadian Institutes for Health Research (CIHR  
938 MOP 133619 (CG)). fNIRS equipment was acquired using grants from NSERC  
939 Research Tools and Instrumentation Program and the Canadian Foundation  
940 for Innovation (CG). ZC is funded by the Fonds de recherche du Qubec  
941 Sante (FRQS) Doctoral Training Scholarship and the PERFORM Graduate  
942 Scholarship in Preventive Health Research. GP is funded by Strauss Canada  
943 Foundation.

#### 944 **Data availability**

945 The original raw data supporting the findings of this study are available  
946 upon reasonable request to the corresponding authors.



947 **Conflict of interest**

948 The authors declare no potential conflict of interest.

## Appendix A. Supplementary material

Supplementary material associated with this article can be found at the end of this manuscript.

## References

- Aasted C.M., Yücel M.A., Cooper R.J., Dubb J., Tsuzuki D., Becerra L., Petkov M.P., Borsook D., Dan I., Boas D.A., 2015. Anatomical guidance for functional near-infrared spectroscopy: AtlasViewer tutorial. *Neurophotonics* 2, 020801.
- Amblard C., Lapalme E., Lina J.M., 2004. Biomagnetic Source Detection by Maximum Entropy and Graphical Models. *IEEE Transactions on Biomedical Engineering* 51, 427–442.
- Arridge S.R., 1999. Optical tomography in medical imaging. *Inverse Problems* 15, R41.
- Arridge S.R., 2011. Methods in diffuse optical imaging. *Philosophical Transactions of the Royal Society A: Mathematical, Physical and Engineering Sciences* 369, 4558–4576.
- Aydin Ü., Pellegrino G., Ali O.B.K.b., Abdallah C., Abdallah C., Dubeau F., Lina J.M., Lina J.M., Kobayashi E., Grova C., Grova C., Grova C., Grova C., 2020. Magnetoencephalography resting state connectivity patterns as

- indicatives of surgical outcome in epilepsy patients. *Journal of Neural Engineering* 17, 35007.
- Boas D.A., Brooks D.H., Miller E.L., Dimarzio C.A., Kilmer M., Gaudette R.J., Zhang Q., 2001. Imaging the body with diffuse optical tomography. *IEEE Signal Processing Magazine* 18, 57–75.
- Boas D.A., Chen K., Grebert D., Franceschini M.A., 2004a. Improving the diffuse optical imaging spatial resolution of the cerebral hemodynamic response to brain activation in humans. *Optics Letters* 29, 1506.
- Boas D.A., Culver J.P., Stott J.J., Dunn A.K., 2002. Three dimensional Monte Carlo code for photon migration through complex heterogeneous media including the adult human head. *Optics Express* 10, 159.
- Boas D.A., Dale A.M., 2005. Simulation study of magnetic resonance imaging-guided cortically constrained diffuse optical tomography of human brain function. *Applied Optics* 44, 1957.
- Boas D.A., Dale A.M., Franceschini M.A., 2004b. Diffuse optical imaging of brain activation: Approaches to optimizing image sensitivity, resolution, and accuracy, in: *NeuroImage*, Academic Press. pp. S275–S288.
- Cao N., Nehorai A., Jacobs M., 2007. Image reconstruction for diffuse optical tomography using sparsity regularization and expectation-maximization algorithm. *Opt Express* 15, 13695–13708.
- Chen W.L., Wagner J., Heugel N., Sugar J., Lee Y.W., Conant L., Malloy M., Heffernan J., Quirk B., Zinos A., Beardsley S.A., Prost R., Whelan H.T.,

2020. Functional Near-Infrared Spectroscopy and Its Clinical Application in the Field of Neuroscience: Advances and Future Directions. *Frontiers in Neuroscience* 14, 1–15.
- Chowdhury R.A., Lina J.M., Kobayashi E., Grova C., 2013. MEG Source Localization of Spatially Extended Generators of Epileptic Activity: Comparing Entropic and Hierarchical Bayesian Approaches. *PLoS ONE* 8.
- Chowdhury R.A., Merlet I., Birot G., Kobayashi E., Nica A., Biraben A., Wendling F., Lina J.M., Albera L., Grova C., 2016. Complex patterns of spatially extended generators of epileptic activity: Comparison of source localization methods cMEM and 4-ExSo-MUSIC on high resolution EEG and MEG data. *NeuroImage* 143, 175–195.
- Chowdhury R.A., Pellegrino G., Aydin ., Lina J.M., Dubeau F., Kobayashi E., Grova C., 2018. Reproducibility of EEG-MEG fusion source analysis of interictal spikes: Relevance in presurgical evaluation of epilepsy. *Human Brain Mapping* 39, 880–901.
- Chowdhury R.A., Zerouali Y., Hedrich T., Heers M., Kobayashi E., Lina J.M., Grova C., 2015. MEG/EEG Information Fusion and Electromagnetic Source Imaging: From Theory to Clinical Application in Epilepsy. *Brain Topography* 28, 785–812.
- Culver J.P., Durduran T., Furuya D., Cheung C., Greenberg J.H., Yodh A.G., 2003. Diffuse optical tomography of cerebral blood flow, oxygenation, and metabolism in rat during focal ischemia. *Journal of Cerebral Blood Flow and Metabolism* 23, 911–924.

- Dale A.M., Sereno M.I., 1993. Improved Localization of Cortical Activity by Combining EEG and MEG with MRI Cortical Surface Reconstruction: A Linear Approach. *Journal of Cognitive Neuroscience* 5, 162–176.
- Dehghani H., White B.R., Zeff B.W., Tizzard A., Culver J.P., 2009. Depth sensitivity and image reconstruction analysis of dense imaging arrays for mapping brain function with diffuse optical tomography. *Applied Optics* 48, D137.
- Delpy D.T., Cope M., Van Der Zee P., Arridge S., Wray S., Wyatt J., 1988. Estimation of optical pathlength through tissue from direct time of flight measurement. *Physics in Medicine and Biology* 33, 1433–1442.
- Eggebrecht A.T., Ferradal S.L., Robichaux-Viehoever A., Hassanpour M.S., Dehghani H., Snyder A.Z., Hershey T., Culver J.P., 2014. Mapping distributed brain function and networks with diffuse optical tomography. *Nature Photonics* 8, 448–454.
- Eggebrecht A.T., Muccigrosso D., Culver J.P., 2019. NeuroDOT: an extensible Matlab toolbox for streamlined optical brain mapping (Conference Presentation), in: Fantini S., Taroni P., Tromberg B.J., Sevick-Muraca E.M. (Eds.), *Optical Tomography and Spectroscopy of Tissue XIII*, SPIE. p. 51.
- Eggebrecht A.T., White B.R., Ferradal S.L., Chen C., Zhan Y., Snyder A.Z., Dehghani H., Culver J.P., 2012. A quantitative spatial comparison of high-density diffuse optical tomography and fMRI cortical mapping. *NeuroImage* 61, 1120–1128.

- von Ellenrieder N., Pellegrino G., Hedrich T., Gotman J., Lina J.M., Grova C., Kobayashi E., 2016. Detection and Magnetic Source Imaging of Fast Oscillations (40160Hz) Recorded with Magnetoencephalography in Focal Epilepsy Patients. *Brain Topography* 29, 218–231.
- Fang Q., 2010. Mesh-based Monte Carlo method using fast ray-tracing in Plücker coordinates. *Biomedical Optics Express* 1, 165.
- Fang Q., Boas D.A., 2009. Monte Carlo Simulation of Photon Migration in 3D Turbid Media Accelerated by Graphics Processing Units. *Optics Express* 17, 20178.
- Fischl B., Salat D.H., Busa E., Albert M., Dieterich M., Haselgrove C., Van Der Kouwe A., Killiany R., Kennedy D., Klaveness S., Montillo A., Makris N., Rosen B., Dale A.M., 2002. Whole brain segmentation: Automated labeling of neuroanatomical structures in the human brain. *Neuron* 33, 341–355.
- Friston K., Harrison L., Daunizeau J., Kiebel S., Phillips C., Trujillo-Barreto N., Henson R., Flandin G., Mattout J., 2008. Multiple sparse priors for the M/EEG inverse problem. *NeuroImage* 39, 1104–1120.
- Fuchs M., Wagner M., Köhler T., Wischmann H.A., 1999. Linear and non-linear current density reconstructions. *Journal of Clinical Neurophysiology* 16, 267–295.
- Grova C., Aiguabella M., Zelmann R., Lina J.M., Hall J.A., Kobayashi E., 2016. Intracranial EEG potentials estimated from MEG sources: A new

- approach to correlate MEG and iEEG data in epilepsy. *Human Brain Mapping* 37, 1661–1683.
- Grova C., Daunizeau J., Lina J.M., Bénar C.G., Benali H., Gotman J., 2006. Evaluation of EEG localization methods using realistic simulations of interictal spikes. *NeuroImage* 29, 734–753.
- Hämäläinen M.S., Ilmoniemi R.J., 1994. Interpreting magnetic fields of the brain: minimum norm estimates. *Medical & Biological Engineering & Computing* 32, 35–42.
- Hansen P.C., 2000. The L-Curve and its Use in the Numerical Treatment of Inverse Problems. in *Computational Inverse Problems in Electrocardiology*, ed. P. Johnston, *Advances in Computational Bioengineering* 4, 119–142.
- Hedrich T., Pellegrino G., Kobayashi E., Lina J.M., Grova C., 2017. Comparison of the spatial resolution of source imaging techniques in high-density EEG and MEG. *NeuroImage* 157, 531–544.
- Heers M., Chowdhury R.A., Hedrich T., Dubeau F., Hall J.A., Lina J.M., Grova C., Kobayashi E., 2016. Localization Accuracy of Distributed Inverse Solutions for Electric and Magnetic Source Imaging of Interictal Epileptic Discharges in Patients with Focal Epilepsy. *Brain Topography* 29, 162–181.
- Hughes I., Blasiolo B., Huss D., Warchol M.E., Rath N.P., Hurle B., Ignatova E., David Dickman J., Thalmann R., Levenson R., Ornitz D.M., 2004. Otopetrin 1 is required for otolith formation in the zebrafish *Danio rerio*. *Developmental Biology* 276, 391–402.

- Huppert T., Barker J., Schmidt B., Walls S., Ghuman A., 2017. Comparison of group-level, source localized activity for simultaneous functional near-infrared spectroscopy-magnetoencephalography and simultaneous fNIRS-fMRI during parametric median nerve stimulation. *Neurophotonics* 4, 015001.
- Jenkinson M., Beckmann C.F., Behrens T.E.J., Woolrich M.W., Smith S.M., 2012. Review FSL. *NeuroImage* 62, 782–790.
- Joseph D.K., Huppert T.J., Franceschini M.A., Boas D.A., 2006. Diffuse optical tomography system to image brain activation with improved spatial resolution and validation with functional magnetic resonance imaging. *Applied Optics* 45, 8142.
- Kavuri V.C., Lin Z.J., Tian F., Liu H., 2012. Sparsity enhanced spatial resolution and depth localization in diffuse optical tomography. *Biomedical Optics Express* 3, 943.
- Kawaguchi H., Hayashi T., Kato T., Okada E., 2004. Theoretical evaluation of accuracy in position and size of brain activity obtained by near-infrared topography. *Physics in Medicine and Biology* 49, 2753–2765.
- Kawaguchi H., Koyama T., Okada E., 2007. Effect of probe arrangement on reproducibility of images by near-infrared topography evaluated by a virtual head phantom. *Applied Optics* 46, 1658.
- Lapalme E., Lina J.M., Mattout J., 2006. Data-driven parceling and entropic inference in MEG. *NeuroImage* 30, 160–171.

- Li A., Zhang Q., Culver J.P., Miller E.L., Boas D.A., 2004. Reconstructing chromosphere concentration images directly by continuous-wave diffuse optical tomography. *Optics Letters* 29, 256.
- Lin F.H., Witzel T., Ahlfors S.P., Stufflebeam S.M., Belliveau J.W., Hämäläinen M.S., 2006. Assessing and improving the spatial accuracy in MEG source localization by depth-weighted minimum-norm estimates. *NeuroImage* 31, 160–171.
- Machado A., Cai Z., Pellegrino G., Marcotte O., Vincent T., Lina J.M., Kobayashi E., Grova C., 2018. Optimal positioning of optodes on the scalp for personalized functional near-infrared spectroscopy investigations. *Journal of Neuroscience Methods* 309, 91–108.
- Machado A., Cai Z., Vincent T., Pellegrino G., Lina J.M., Kobayashi E., Grova C., 2021. Deconvolution of hemodynamic responses along the cortical surface using personalized functional near infrared spectroscopy. *Scientific Reports* , 1–19.
- Machado A., Marcotte O., Lina J.M., Kobayashi E., Grova C., 2014. Optimal optode montage on electroencephalography/functional near-infrared spectroscopy caps dedicated to study epileptic discharges. *Journal of Biomedical Optics* 19, 026010.
- Mattout J., Péligrini-Issac M., Garnero L., Benali H., 2005. Multivariate source prelocalization (MSP): Use of functionally informed basis functions for better conditioning the MEG inverse problem. *NeuroImage* 26, 356–373.



- Novi S.L., Forero E.J., Rubianes Silva J.A.I., de Souza N.G.S., Martins G.G., Quiroga A., Wu S.T., Mesquita R.C., 2020. Integration of Spatial Information Increases Reproducibility in Functional Near-Infrared Spectroscopy. *Frontiers in Neuroscience* 14, 1–12.
- Okawa S., Hoshi Y., Yamada Y., 2011. Improvement of image quality of time-domain diffuse optical tomography with lp sparsity regularization. *Biomedical Optics Express* 2, 3334.
- Pellegrino G., Hedrich T., Chowdhury R., Hall J.A., Lina J.M., Dubeau F., Kobayashi E., Grova C., 2016. Source localization of the seizure onset zone from ictal EEG/MEG data. *Human Brain Mapping* 37, 2528–2546.
- Pellegrino G., Hedrich T., PorrasBettancourt M., Lina J., Aydin ., Hall J., Grova C., Kobayashi E., 2020. Accuracy and spatial properties of distributed magnetic source imaging techniques in the investigation of focal epilepsy patients. *Human Brain Mapping* 41, 3019–3033.
- Piper S.K., Krueger A., Koch S.P., Mehnert J., Habermehl C., Steinbrink J., Obrig H., Schmitz C.H., 2014. A wearable multi-channel fNIRS system for brain imaging in freely moving subjects. *NeuroImage* 85, 64–71.
- Prakash J., Shaw C.B., Manjappa R., Kanhirodan R., Yalavarthy P.K., 2014. Sparse recovery methods hold promise for diffuse optical tomographic image reconstruction. *IEEE Journal on Selected Topics in Quantum Electronics* 20.
- Raffin E., Pellegrino G., Di Lazzaro V., Thielscher A., Siebner H.R., 2015. Bringing transcranial mapping into shape: Sulcus-aligned mapping cap-

- tures motor somatotopy in human primary motor hand area. *NeuroImage* 120, 164–175.
- Sakakibara Y., Kurihara K., Okada E., 2016. Evaluation of improvement of diffuse optical imaging of brain function by high-density probe arrangements and imaging algorithms. *Optical Review* 23, 346–353.
- Schmitz C.H., Klemer D.P., Hardin R., Katz M.S., Pei Y., Graber H.L., Levin M.B., Levina R.D., Franco N.A., Solomon W.B., Barbour R.L., 2005. Design and implementation of dynamic near-infrared optical tomographic imaging instrumentation for simultaneous dual-breast measurements. *Applied Optics* 44, 2140.
- Schneider P., Piper S., Schmitz C.H., Schreiter N.F., Volkwein N., Lüdemann L., Malzahn U., Poellinger A., 2011. Fast 3D near-infrared breast imaging using indocyanine green for detection and characterization of breast lesions. *RoFo Fortschritte auf dem Gebiet der Rontgenstrahlen und der Bildgebenden Verfahren* 183, 956–963.
- Scholkmann F., Kleiser S., Metz A.J., Zimmermann R., Mata Pavia J., Wolf U., Wolf M., 2014. A review on continuous wave functional near-infrared spectroscopy and imaging instrumentation and methodology.
- Shimokawa T., Kosaka T., Yamashita O., Hiroe N., Amita T., Inoue Y., Sato M.a., 2012. Hierarchical Bayesian estimation improves depth accuracy and spatial resolution of diffuse optical tomography. *Optics Express* 20, 20427.
- Shimokawa T., Kosaka T., Yamashita O., Hiroe N., Amita T., Inoue Y., Sato

- M.a., 2013. Extended hierarchical Bayesian diffuse optical tomography for removing scalp artifact. *Biomedical Optics Express* 4, 2411.
- van der Sluis A., 1969. Condition numbers and equilibration of matrices. *Numerische Mathematik* 14, 14–23.
- Smith S.M., Jenkinson M., Woolrich M.W., Beckmann C.F., Behrens T.E., Johansen-Berg H., Bannister P.R., De Luca M., Drobnjak I., Flitney D.E., Niazy R.K., Saunders J., Vickers J., Zhang Y., De Stefano N., Brady J.M., Matthews P.M., 2004. Advances in functional and structural MR image analysis and implementation as FSL, in: *NeuroImage*, Academic Press. pp. S208–S219.
- Sohrabpour A., He B., 2021. Exploring the Extent of Source Imaging: Recent Advances in Noninvasive Electromagnetic Brain Imaging. *Current Opinion in Biomedical Engineering* , 100277.
- Strangman G., Franceschini M.A., Boas D.A., 2003. Factors affecting the accuracy of near-infrared spectroscopy concentration calculations for focal changes in oxygenation parameters. *NeuroImage* 18, 865–879.
- Strangman G.E., Li Z., Zhang Q., 2013. Depth Sensitivity and Source-Detector Separations for Near Infrared Spectroscopy Based on the Colin27 Brain Template. *PLoS ONE* 8.
- Süzen M., Giannoula A., Durduran T., 2010. Compressed sensing in diffuse optical tomography. *Optics Express* 18, 23676.
- Tadel F., Baillet S., Mosher J.C., Pantazis D., Leahy R.M., 2011. Brainstorm:

- A user-friendly application for MEG/EEG analysis. *Computational Intelligence and Neuroscience* 2011, 879716.
- Tremblay J., Martínez-Montes E., Vannasing P., Nguyen D.K., Sawan M., Lepore F., Gallagher A., 2018. Comparison of source localization techniques in diffuse optical tomography for fNIRS application using a realistic head model. *Biomedical Optics Express* 9, 2994.
- Trujillo-Barreto N.J., Aubert-Vázquez E., Valdés-Sosa P.A., 2004. Bayesian model averaging in EEG/MEG imaging. *NeuroImage* 21, 1300–1319.
- White B.R., Culver J.P., 2010. Quantitative evaluation of high-density diffuse optical tomography: *in vivo* resolution and mapping performance. *Journal of Biomedical Optics* 15, 026006.
- White B.R., Snyder A.Z., Cohen A.L., Petersen S.E., Raichle M.E., Schlaggar B.L., Culver J.P., 2009. Resting-state functional connectivity in the human brain revealed with diffuse optical tomography. *NeuroImage* 47, 148–156.
- Yamashita O., Shimokawa T., Aisu R., Amita T., Inoue Y., Sato M.a., 2016. Multi-subject and multi-task experimental validation of the hierarchical Bayesian diffuse optical tomography algorithm. *NeuroImage* 135, 287–299.
- Ye J.C., Tak S., Jang K.E., Jung J., Jang J., 2009. NIRS-SPM: Statistical parametric mapping for near-infrared spectroscopy. *NeuroImage* 44, 428–447.
- Yu L., Nina-Paravecino F., Kaeli D., Fang Q., 2018. Scalable and massively parallel Monte Carlo photon transport simulations for heterogeneous computing platforms. *Journal of Biomedical Optics* 23, 1.

Yücel M.A., Lüthmann A.v., Scholkmann F., Gervain J., Dan I., Ayaz H., Boas D., Cooper R.J., Culver J., Elwell C.E., Eggebrecht A., Franceschini M.A., Grova C., Homae F., Lesage F., Obrig H., Tachtsidis I., Tak S., Tong Y., Torricelli A., Wabnitz H., Wolf M., 2021. Best practices for fNIRS publications. *Neurophotonics* 8, 1–34.

Yücel M.A., Selb J., Boas D.A., Cash S.S., Cooper R.J., 2014. Reducing motion artifacts for long-term clinical NIRS monitoring using collodion-fixed prism-based optical fibers. *NeuroImage* 85, 192–201.

Zeff B.W., White B.R., Dehghani H., Schlaggar B.L., Culver J.P., 2007. Retinotopic mapping of adult human visual cortex with high-density diffuse optical tomography. *Proceedings of the National Academy of Sciences* 104, 12169–12174.

Zhan Y., Eggebrecht A.T., Culver J.P., Dehghani H., 2012. Image Quality Analysis of High-Density Diffuse Optical Tomography Incorporating a Subject-Specific Head Model. *Frontiers in Neuroenergetics* 4, 6.

## Supplementary material

### *S1. Validation metrics*

Here is a detailed description of the four validation metrics considered in our evaluation. Except the shape error (SE), other metrics were all calculated at the time instant  $\tau$  when the simulated  $\Delta OD$  time course reached its peak value (e.g. 12.2s after onset).

**Area Under the Receiver Operating Characteristic (ROC) curve (AUC)** was used to assess overall detection accuracy of the reconstruction methods. We used a specific version of AUC that has been proposed in (Grova et al., 2006) in order not to bias results towards false positives. In further details, ROC curves were generated by plotting the sensibility of the detection as a function of 1-specificity, while thresholding the normalized reconstruction map from 0 to 1 with a certain step value. In the context of source reconstruction, especially when the generator is focal, the region of true positive is usually much smaller than the region of true negative, whereas non-biased AUC evaluation would require to sample the same amount of active and inactive generators. To overcome this possible bias, we considered a ROC evaluation using the same number of active and inactive generators that were randomly sampled within two different regions: 1)  $AUC_{close}$ : inactive generators were sampled within the immediate spatial neighborhood of the ground truth; and 2)  $AUC_{far}$ : inactive generators were sampled within the local maxima of the reconstructed activity located far from the ground truth. The final AUC was then the average of  $AUC_{close}$  and  $AUC_{far}$ .

**Minimum geodesic distance (Dmin)** was represented by the geodesic distance, following the circumvolutions of the cortical surface, of the vertex

that exhibited maximum of reconstructed activity to the border of the ‘generator’. It should be 0 when the peak of the reconstruction map was located inside the simulated cortical region.

**Spatial Dispersion (SD)** assessed the spatial spread of the estimated ‘generator’ distribution and the localization error using Eq.S1. The ideal value (i.e.  $SD = 0mm$ ), was achieved when no activation was reconstructed outside the theoretical ‘generator’. The larger the SD was, the more spatially spread were the reconstructed maps.

$$SD = \sqrt{\frac{\sum_{i=1}^K \left( \min_{j \in \Theta} (D^2(i, j)) \hat{X}^2(i, \tau) \right)}{\sum_{i=1}^K \left( \hat{X}^2(i, \tau) \right)}} \quad (S1)$$

where  $\min_{j \in \Theta} (D^2(i, j))$  is the minimum Euclidean distance between the vertex  $i$  to the vertex  $j$  which is located inside the simulated ‘generator’ ( $\Theta$ ).  $\hat{X}^2(i, \tau)$  is the power of the amplitude of reconstructed time course on vertex  $i$  at time  $\tau$ .  $K$  is the total number of vertices within the reconstruction field of view.

**Shape error(SE)** evaluated the temporal accuracy of the reconstruction. Reconstructed time courses within the simulation ‘generator’ were averaged and normalized. The root mean square of the difference between this time course and the normalized theoretical time course was estimated and denoted as SE in Eq.S2 as introduced in (Chowdhury et al., 2013)

$$SE = \sqrt{\frac{1}{T} \sum_t \left( \frac{X_{th}(t)}{\max(|X_{th}(t)|)} - \frac{\text{mean}_{j \in \Theta}(\hat{X}(j, t))}{\max(|\text{mean}_{j \in \Theta}(\hat{X}(j, t))|)} \right)^2} \quad (S2)$$

where  $T$  is length of the time course.  $X_{th}(t)$  is the theoretical time course of

the simulation.  $mean_{j \in \Theta}(\hat{X}(j, t))$  is the averaged mean of the reconstructed time courses within the ‘generator’.

### *S2. Effects of depth weighting on MNE*

We first investigated the effects of depth weighting factor  $\omega_2$  selection for depth weighted MNE. To do so, we evaluated spatial and temporal performances of DOT reconstruction. As presented in Fig.S1, we compared depth weighted MNE using depth weighting factors  $\omega_2 = 0, 0.1, 0.3, 0.5, 0.7, 0.9$  in superficial seeds case. In general,  $\omega_2 = 0.3$  and  $0.5$  provided overall the most accurate results (i.e. median  $AUC > 0.8$  and  $Dmin = 0mm$ ). For focal generators (i.e.  $Se = 3, 5$ ),  $\omega_2 = 0.3$  performed better than  $\omega_2 = 0.5$  considering it was providing significantly lower SD. However, in extended generators (i.e.  $Se = 7, 9$ ), reconstructions with  $\omega_2 = 0.5$  were exhibiting more accurate results, consisting in significantly positive AUC difference (0.05 and 0.08,  $p < 0.001$ ) and significantly positive SD difference (2.24 and 2.06,  $p < 0.001$ ).  $\omega_2 = 0$  and  $0.1$  only provided AUC higher than 0.8 in the case of  $Se = 3$ , whereas  $\omega_2 = 0.7$  and  $0.9$  failed in all cases and even the median values of  $Dmin$  were significantly larger (median values around 2-3 cm) than other cases. Based on these results, we decided to consider only the depth weighting values  $\omega_2 = 0.3$  and  $0.5$  for depth weighting MNE in the comparisons with with MEM reconstructions.

### *S3. MEM v.s. MNE with realistic simulations involving middle and deep seeds*

In Fig.S2 and Table.S1, we are presenting the comparison of MEM and MNE in middle seeds case. First of all, we found that more depth compen-



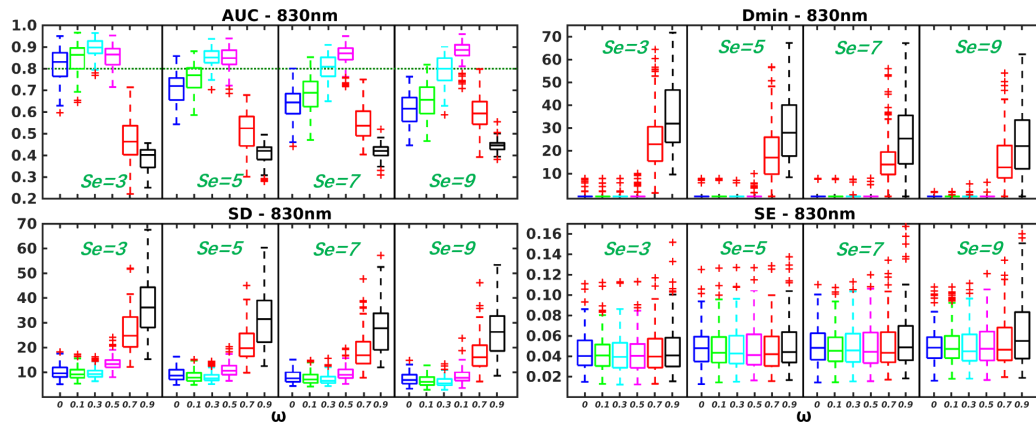

**Fig.S1.** Evaluation of the performances of depth weighted MNE for different depth weighting factors  $\omega = 0, 0.1, 0.3, 0.5, 0.7, 0.9$ . Distribution of validation metrics (AUC, Dmin, SD and SE) are displayed using boxplot representations, for simulations involving superficial seeds only and for spatial extents  $Se = 3, 5, 7, 9$ .

sation was required to provide good reconstructions in all scenarios. Thus, MEM(0.5, 0.5) was compared to the best of MNE - MNE(0.5). Non-significant AUC and Dmin differences were found between them. However, MEM(0.5, 0.5) provided significant lower SD than MNE(0.5), median value of difference of  $SD = -5.33, -4.80, -5.00, -4.95, p < 0.001$  for  $Se = 3, 5, 7, 9$  respectively. Fig.S3 and Table.S2 are presenting the comparison of MEM and MNE in the comparison of them in deep seeds case. Similarly, no significant AUC and Dmin differences were found. MEM(0.5, 0.5) provided significant lower SD than MNE(0.5), median value of difference of  $SD = -6.39, -6.33, -6.97, -5.52, P < 0.001$  for  $Se = 3, 5, 7, 9$  respectively. For temporal performance in these two cases, similar to Fig.3, MNE(0.5) gave significant lower SE ( $-0.01$  or  $-0.02, p < 0.001$ ) than MEM when  $Se = 3, 5$  (small difference). No significant different SE was found in  $Se = 7, 9$ .

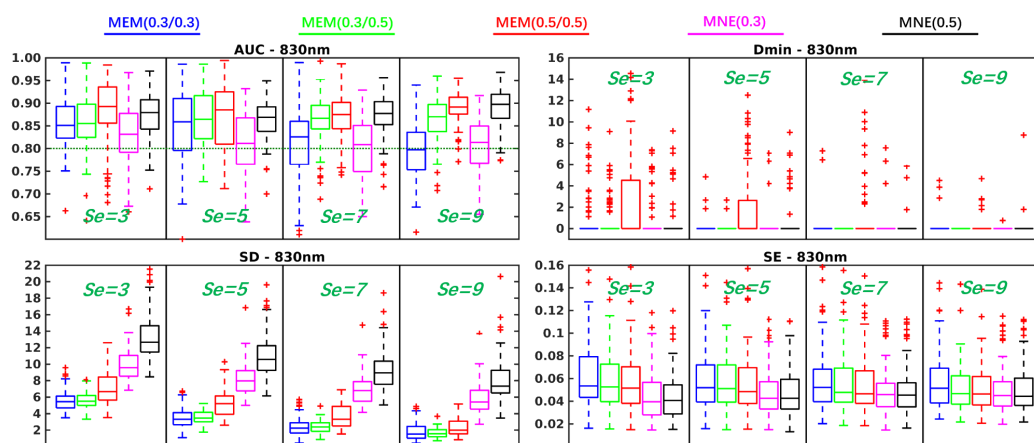

**Fig.S2.** Evaluation of the performances of MEM and MNE using realistic simulations involving middle seeds for different spatial extent ( $Se = 3, 5, 7, 9$ ). Boxplot representation of the distribution of four validation metrics for three depth weighted strategies of MEM and two depth weighted strategies of MNE, namely: MEM(0.3, 0.3) in blue, MEM(0.3, 0.5) in green, MEM(0.5, 0.5) in red, MNE(0.3) in magenta and MNE(0.5) in black. Results were obtained after DOT reconstruction of 830nm  $\Delta OD$ .

| Middle Seeds |                | Se = 3    |           | Se = 5    |           | Se = 7    |           | Se = 9    |           |
|--------------|----------------|-----------|-----------|-----------|-----------|-----------|-----------|-----------|-----------|
|              |                | MNE (0.3) | MNE (0.5) | MNE (0.3) | MNE (0.5) | MNE (0.3) | MNE (0.5) | MNE (0.3) | MNE (0.5) |
| AUC          | MEM (0.3, 0.3) | 0.03**    | -0.03     | 0.03**    | 0.00      | 0.02      | -0.05**   | -0.02     | -0.10**   |
|              | MEM (0.3, 0.5) | 0.03**    | -0.03     | 0.05**    | 0.01      | 0.05**    | -0.01     | 0.05**    | -0.02**   |
|              | MEM (0.5, 0.5) | 0.06**    | 0.02      | 0.07**    | 0.01      | 0.07**    | -0.01     | 0.08**    | 0.00      |
| Dmin         | MEM (0.3, 0.3) | 0.00      | 0.00      | 0.00      | 0.00      | 0.00      | 0.00      | 0.00      | 0.00      |
|              | MEM (0.3, 0.5) | 0.00      | 0.00      | 0.00      | 0.00      | 0.00      | 0.00      | 0.00      | 0.00      |
|              | MEM (0.5, 0.5) | 0.00      | 0.00      | 0.00      | 0.00      | 0.00      | 0.00      | 0.00      | 0.00      |
| SD           | MEM (0.3, 0.3) | -4.05**   | -7.21**   | -4.27**   | -7.25**   | -4.10**   | -6.40**   | -3.58**   | -5.43**   |
|              | MEM (0.3, 0.5) | -4.00**   | -7.06**   | -4.09**   | -6.90**   | -3.96**   | -6.40**   | -3.65**   | -5.45**   |
|              | MEM (0.5, 0.5) | -2.54**   | -5.33**   | -2.46**   | -4.80**   | -2.85**   | -5.00**   | -3.08**   | -4.95**   |
| SE           | MEM (0.3, 0.3) | 0.02**    | 0.02**    | 0.01**    | 0.01**    | 0.01**    | 0.01*     | 0.00      | 0.01      |
|              | MEM (0.3, 0.5) | 0.01**    | 0.01**    | 0.01**    | 0.01**    | 0.00      | 0.00      | 0.00      | 0.00      |
|              | MEM (0.5, 0.5) | 0.01**    | 0.01**    | 0.01**    | 0.01*     | 0.00      | 0.00      | 0.00      | 0.00      |

**Table.S1.** Wilcoxon signed rank test results of reconstruction performance comparison of MEM and MNE in middle seeds case. Median values of paired difference are presented in the table. p values were corrected for multiple comparisons using Bonferroni correction, \* indicates  $p < 0.01$  and \*\* represents  $p < 0.001$ . Median of the paired difference of each validation metrics is color coded as follows: green: MEM is significantly better than MNE, red: MNE is significantly better than MEM and gray: non-significance.

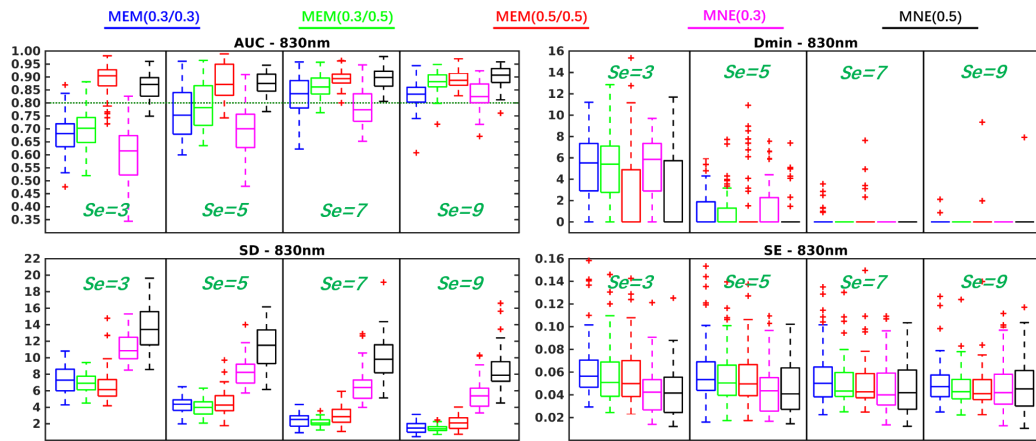

**Fig.S3.** Evaluation of the performances of MEM and MNE using realistic simulations involving deep seeds for different spatial extent ( $Se = 3, 5, 7, 9$ ). Boxplot representation of the distribution of four validation metrics for three depth weighted strategies of MEM and two depth weighted strategies of MNE, namely: MEM(0.3, 0.3) in blue, MEM(0.3, 0.5) in green, MEM(0.5, 0.5) in red, MNE(0.3) in magenta and MNE(0.5) in black. Results were obtained after DOT reconstruction of 830nm  $\Delta OD$ .

| Deep Seeds |                | Se = 3    |           | Se = 5    |           | Se = 7    |           | Se = 9    |           |
|------------|----------------|-----------|-----------|-----------|-----------|-----------|-----------|-----------|-----------|
|            |                | MNE (0.3) | MNE (0.5) | MNE (0.3) | MNE (0.5) | MNE (0.3) | MNE (0.5) | MNE (0.3) | MNE (0.5) |
| AUC        | MEM (0.3, 0.3) | 0.08**    | -0.20**   | 0.06**    | -0.13**   | 0.05**    | -0.08**   | 0.00      | -0.07**   |
|            | MEM (0.3, 0.5) | 0.09**    | -0.17**   | 0.08**    | -0.08**   | 0.08**    | -0.03*    | 0.05**    | -0.02     |
|            | MEM (0.5, 0.5) | 0.29**    | 0.03      | 0.18**    | -0.01     | 0.13**    | -0.01     | 0.06**    | -0.01     |
| Dmin       | MEM (0.3, 0.3) | 0.00      | 2.91      | 0.00      | 0.00      | 0.00      | 0.00      | 0.00      | 0.00      |
|            | MEM (0.3, 0.5) | 0.00      | 2.16      | 0.00      | 0.00      | 0.00      | 0.00      | 0.00      | 0.00      |
|            | MEM (0.5, 0.5) | -3.53     | 0.00      | 0.00      | 0.00      | 0.00      | 0.00      | 0.00      | 0.00      |
| SD         | MEM (0.3, 0.3) | -3.73**   | -6.25**   | -3.65**   | -7.37**   | -3.51**   | -7.39**   | -3.46**   | -6.21**   |
|            | MEM (0.3, 0.5) | -4.00**   | -6.61**   | -3.83**   | -7.54**   | -3.95**   | -7.63**   | -3.82**   | -6.50**   |
|            | MEM (0.5, 0.5) | -4.56**   | -6.39**   | -3.73**   | -6.33**   | -3.10**   | -6.97**   | -3.33**   | -5.52**   |
| SE         | MEM (0.3, 0.3) | 0.02**    | 0.02**    | 0.02**    | 0.02**    | 0.01*     | 0.01      | 0.01      | 0.00      |
|            | MEM (0.3, 0.5) | 0.01**    | 0.01**    | 0.01*     | 0.01**    | 0.01      | 0.01      | 0.00      | 0.00      |
|            | MEM (0.5, 0.5) | 0.01*     | 0.01**    | 0.01*     | 0.01*     | 0.00      | 0.01      | 0.00      | 0.00      |

**Table.S2.** Wilcoxon signed rank test results of reconstruction performance comparison of MEM and MNE in deep seeds case. Median values of paired difference are presented in the table. p values were corrected for multiple comparisons using Bonferroni correction, \* indicates  $p < 0.01$  and \*\* represents  $p < 0.001$ . Median of the paired difference of each validation metrics is color coded as follows: green: MEM is significantly better than MNE, red: MNE is significantly better than MEM and gray: non-significance.
